# Supplementary material for: Messenger RNA levels of enzymes involved in glycerolipid synthesis in the brain of the mouse and its alterations in Agpat2-/- and db/db mice
Source: Research Square preprint supplement (doi:10.21203/rs.3.rs-128675/v1), 2020-12-16
Supplement: Supplementary file 1 [file c73fa553adf16f8e55f91933.docx]

Supplementary data to:

Messenger RNA levels of enzymes involved in glycerolipid synthesis in the brain of the mouse and its alterations in *Agpat2*-/- and db/db mice.

Lila González-Hódara, Anil K. Agarwalb and Víctor Cortésa,c

aDepartment of Nutrition, Diabetes and Metabolism, School of Medicine, Pontificia Universidad Católica de Chile, 8331150, Chile.

bDivision of Nutrition and Metabolic Diseases, Center for Human Nutrition, Department of Internal Medicine, University of Texas Southwestern Medical Center at Dallas, TX 75390, USA.

cCorresponding author, contact information: email: [vcortesm@uc.cl](mailto:vcortesm@uc.cl), phone: 56 2 23546389, address: Avenida Libertador Bernardo O´Higgins 340, Santiago, Chile

Running title: Glycerolipid enzymes in mouse brain

Table of contents

[Table S1: Data obtained from qPCR experiments of Figure 1. 3](#_Toc52041213)

[Table S2: Data obtained from qPCR experiments of Figure 2. 9](#_Toc52041214)

[Table S3: Data obtained from qPCR experiments of Figure 3. 18](#_Toc52041215)

[Table S4: Values of Cycle threshold (Ct) of reference genes obtained from qPCR experiments. 27](#_Toc52041216)

[Table S5: Summary of the changes in mRNA levels of the enzymes involved in glycerolipids synthesis in *Agpat2-/-* and *Leprdb/db* mice. 29](#_Toc52041217)

[Table S6: Diagram of the PCR plates used to generate the data of the manuscript. 31](#_Toc52041218)

# Table S1: Data obtained from qPCR experiments of Figure 1.

| Gene | Brain region | Mouse number | Ct gene of interest | Ct Cyclophilin | 2-ΔCT | log10 (2-ΔCT) |
| --- | --- | --- | --- | --- | --- | --- |
|
| GPAT1 | Cortex | 1 | 27.180 | 26.314 | 0.549 | -0.260 |
| 2 | 27.013 | 25.524 | 0.356 | -0.449 |
| 3 | 27.171 | 25.638 | 0.346 | -0.461 |
| 4 | 27.141 | 25.788 | 0.392 | -0.407 |
| Hippocampus | 10 | 26.959 | 25.643 | 0.402 | -0.396 |
| 5 | 26.859 | 24.994 | 0.275 | -0.561 |
| 6 | 26.902 | 25.421 | 0.358 | -0.446 |
| 7 | 26.856 | 25.228 | 0.323 | -0.491 |
| Cerebellum | 4 | 27.089 | 25.645 | 0.368 | -0.434 |
| 8 | 26.294 | 24.931 | 0.389 | -0.410 |
| 9 | 26.449 | 25.213 | 0.424 | -0.373 |
| 6 | 26.605 | 25.307 | 0.407 | -0.390 |
| Hypothalamus | 10 | 27.301 | 26.612 | 0.620 | -0.208 |
| 4 | 26.846 | 26.294 | 0.682 | -0.166 |
| 9 | 26.995 | 26.155 | 0.559 | -0.253 |
| 11 | 26.884 | 26.223 | 0.632 | -0.199 |
| GPAT2 | Cortex | 1 | 35.010 | 26.554 | N/A | N/A |
| 2 | 34.929 | 25.547 |
| 3 | 34.719 | 25.600 |
| 4 | 34.969 | 25.788 |
| Hippocampus | 10 | 34.394 | 25.688 |
| 5 | 34.202 | 24.941 |
| 6 | 35.088 | 25.509 |
| 7 | 35.509 | 25.213 |
| Cerebellum | 4 | 35.234 | 25.942 |
| 8 | 35.018 | 24.760 |
| 9 | 34.998 | 25.336 |
| 6 | 34.944 | 25.410 |
| Hypothalamus | 10 | 34.555 | 26.612 |
| 4 | 34.018 | 26.294 |
| 9 | 34.768 | 26.155 |
| 11 | 34.023 | 26.223 |
| AGPAT1 | Cortex | 1 | 25.263 | 26.326 | 2.09 | 0.320 |
| 2 | 24.568 | 25.082 | 1.43 | 0.155 |
| 3 | 24.983 | 25.307 | 1.25 | 0.097 |
| 4 | 24.665 | 25.107 | 1.36 | 0.134 |
| Hippocampus | 10 | 24.752 | 25.142 | 1.31 | 0.117 |
| 5 | 24.620 | 24.513 | 0.929 | -0.032 |
| 6 | 24.886 | 24.904 | 1.01 | 0.004 |
| 7 | 24.726 | 24.812 | 1.06 | 0.025 |
| Cerebellum | 4 | 25.544 | 25.172 | 0.772 | -0.112 |
| 8 | 25.005 | 24.650 | 0.782 | -0.107 |
| 9 | 25.541 | 25.040 | 0.707 | -0.151 |
| 6 | 25.436 | 25.003 | 0.741 | -0.130 |
| Hypothalamus | 10 | 25.757 | 26.242 | 1.4 | 0.146 |
| 4 | 25.010 | 25.307 | 1.23 | 0.090 |
| 9 | 25.320 | 25.678 | 1.28 | 0.107 |
| 11 | 25.164 | 25.894 | 1.66 | 0.220 |
| AGPAT2 | Cortex | 1 | 27.784 | 26.326 | 0.364 | -0.439 |
| 2 | 27.142 | 25.082 | 0.24 | -0.620 |
| 3 | 26.816 | 25.307 | 0.351 | -0.455 |
| 4 | 26.907 | 25.107 | 0.287 | -0.542 |
| Hippocampus | 10 | 26.753 | 25.272 | 0.358 | -0.446 |
| 5 | 25.763 | 24.501 | 0.417 | -0.380 |
| 6 | 25.673 | 24.996 | 0.625 | -0.204 |
| 7 | 26.267 | 24.884 | 0.383 | -0.417 |
| Cerebellum | 4 | 27.489 | 25.942 | 0.342 | -0.466 |
| 8 | 26.415 | 24.760 | 0.317 | -0.499 |
| 9 | 27.140 | 25.336 | 0.286 | -0.544 |
| 6 | 26.235 | 25.410 | 0.564 | -0.249 |
| Hypothalamus | 10 | 26.470 | 26.612 | 1.1 | 0.041 |
| 4 | 26.399 | 26.294 | 0.93 | -0.032 |
| 9 | 26.365 | 26.155 | 0.865 | -0.063 |
| 11 | 26.553 | 26.223 | 0.795 | -0.100 |
| AGPAT3 | Cortex | 1 | 25.750 | 26.717 | 1.96 | 0.292 |
| 2 | 24.913 | 25.451 | 1.45 | 0.161 |
| 3 | 25.074 | 25.844 | 1.71 | 0.233 |
| 4 | 25.110 | 25.662 | 1.47 | 0.167 |
| Hippocampus | 10 | 25.052 | 25.412 | 1.28 | 0.107 |
| 5 | 24.799 | 24.943 | 1.1 | 0.041 |
| 6 | 24.932 | 25.238 | 1.24 | 0.093 |
| 7 | 25.142 | 25.362 | 1.16 | 0.064 |
| Cerebellum | 4 | 24.757 | 25.510 | 1.69 | 0.228 |
| 8 | 24.195 | 24.942 | 1.68 | 0.225 |
| 9 | 24.815 | 25.394 | 1.49 | 0.173 |
| 6 | 24.683 | 25.208 | 1.44 | 0.158 |
| Hypothalamus | 10 | 25.894 | 26.517 | 1.54 | 0.188 |
| 4 | 25.083 | 25.484 | 1.32 | 0.121 |
| 9 | 25.403 | 25.958 | 1.47 | 0.167 |
| 11 | 25.583 | 25.921 | 1.26 | 0.100 |
| AGPAT4 | Cortex | 1 | 23.357 | 26.717 | 10.3 | 1.013 |
| 2 | 22.529 | 25.451 | 7.58 | 0.880 |
| 3 | 22.758 | 25.844 | 8.49 | 0.929 |
| 4 | 22.785 | 25.662 | 7.35 | 0.866 |
| Hippocampus | 10 | 22.437 | 25.412 | 7.86 | 0.895 |
| 5 | 22.235 | 24.943 | 6.54 | 0.816 |
| 6 | 22.599 | 25.238 | 6.23 | 0.794 |
| 7 | 23.004 | 25.362 | 5.13 | 0.710 |
| Cerebellum | 4 | 20.422 | 25.510 | 34 | 1.531 |
| 8 | 19.920 | 24.942 | 32.5 | 1.512 |
| 9 | 20.536 | 25.394 | 29 | 1.462 |
| 6 | 20.493 | 25.208 | 26.3 | 1.420 |
| Hypothalamus | 10 | 20.262 | 26.517 | 76.3 | 1.883 |
| 4 | 19.671 | 25.484 | 56.2 | 1.750 |
| 9 | 19.851 | 25.958 | 68.9 | 1.838 |
| 11 | 20.081 | 25.921 | 57.3 | 1.758 |
| LIPIN1 | Cortex | 1 | 29.103 | 26.326 | 0.146 | -0.836 |
| 2 | 28.193 | 25.082 | 0.116 | -0.936 |
| 3 | 28.457 | 25.307 | 0.113 | -0.947 |
| 4 | 28.409 | 25.107 | 0.101 | -0.996 |
| Hippocampus | 10 | 28.121 | 25.142 | 0.127 | -0.896 |
| 5 | 28.096 | 24.513 | 0.0835 | -1.078 |
| 6 | 28.141 | 24.904 | 0.106 | -0.975 |
| 7 | 28.002 | 24.812 | 0.11 | -0.959 |
| Cerebellum | 4 | 23.547 | 25.172 | 3.08 | 0.489 |
| 8 | 22.712 | 24.650 | 3.83 | 0.583 |
| 9 | 23.354 | 25.040 | 3.22 | 0.508 |
| 6 | 23.119 | 25.003 | 3.69 | 0.567 |
| Hypothalamus | 10 | 24.394 | 26.242 | 3.6 | 0.556 |
| 4 | 23.409 | 25.307 | 3.73 | 0.572 |
| 9 | 23.349 | 25.678 | 5.03 | 0.702 |
| 11 | 22.882 | 25.894 | 8.06 | 0.906 |
| LIPIN2 | Cortex | 1 | 26.774 | 26.717 | 0.961 | -0.017 |
| 2 | 25.871 | 25.451 | 0.747 | -0.127 |
| 3 | 25.963 | 25.844 | 0.921 | -0.036 |
| 4 | 26.038 | 25.662 | 0.771 | -0.113 |
| Hippocampus | 10 | 25.718 | 25.412 | 0.809 | -0.092 |
| 5 | 25.629 | 24.943 | 0.622 | -0.206 |
| 6 | 25.626 | 25.238 | 0.764 | -0.117 |
| 7 | 25.741 | 25.362 | 0.769 | -0.114 |
| Cerebellum | 4 | 27.056 | 25.510 | 0.342 | -0.466 |
| 8 | 26.560 | 24.942 | 0.326 | -0.487 |
| 9 | 27.223 | 25.394 | 0.281 | -0.551 |
| 6 | 26.915 | 25.208 | 0.306 | -0.514 |
| Hypothalamus | 10 | 27.629 | 26.517 | 0.462 | -0.335 |
| 4 | 26.508 | 25.484 | 0.491 | -0.309 |
| 9 | 26.824 | 25.958 | 0.548 | -0.261 |
| 11 | 26.938 | 25.921 | 0.494 | -0.306 |
| LIPIN3 | Cortex | 1 | 33.708 | 26.314 | N/A | N/A |
| 2 | 32.907 | 25.524 |
| 3 | 33.279 | 25.638 |
| 4 | 33.344 | 25.788 |
| Hippocampus | 10 | 33.070 | 25.643 |
| 5 | 32.211 | 24.994 |
| 6 | 33.176 | 25.421 |
| 7 | 32.428 | 25.228 |
| Cerebellum | 4 | 31.723 | 25.645 |
| 8 | 31.396 | 24.931 |
| 9 | 31.729 | 25.213 |
| 6 | 31.191 | 25.307 |
| Hypothalamus | 10 | 33.742 | 26.612 |
| 4 | 34.503 | 26.294 |
| 9 | 35.047 | 26.155 |
| 11 | 33.370 | 26.223 |
| DGAT1 | Cortex | 1 | 30.393 | 26.326 | 0.0597 | -1.224 |
| 2 | 29.645 | 25.082 | 0.0423 | -1.374 |
| 3 | 29.281 | 25.307 | 0.0636 | -1.197 |
| 4 | 29.175 | 25.107 | 0.0596 | -1.225 |
| Hippocampus | 10 | 30.492 | 25.142 | 0.0245 | -1.611 |
| 5 | 28.992 | 24.513 | 0.0449 | -1.348 |
| 6 | 29.545 | 24.904 | 0.0401 | -1.397 |
| 7 | 29.441 | 24.812 | 0.0404 | -1.394 |
| Cerebellum | 4 | 29.168 | 25.172 | 0.0626 | -1.203 |
| 8 | 28.730 | 24.650 | 0.0591 | -1.228 |
| 9 | 28.823 | 25.040 | 0.0727 | -1.138 |
| 6 | 28.909 | 25.003 | 0.0667 | -1.176 |
| Hypothalamus | 10 | 30.778 | 26.242 | 0.0431 | -1.366 |
| 4 | 30.207 | 25.307 | 0.0335 | -1.475 |
| 9 | 30.151 | 25.678 | 0.045 | -1.347 |
| 11 | 30.510 | 25.894 | 0.0408 | -1.389 |
| DGAT2 | Cortex | 1 | 27.263 | 26.326 | 0.522 | -0.282 |
| 2 | 26.458 | 25.082 | 0.385 | -0.415 |
| 3 | 26.816 | 25.307 | 0.351 | -0.455 |
| 4 | 26.757 | 25.107 | 0.318 | -0.498 |
| Hippocampus | 10 | 25.931 | 25.142 | 0.579 | -0.237 |
| 5 | 25.658 | 24.513 | 0.452 | -0.345 |
| 6 | 26.026 | 24.904 | 0.459 | -0.338 |
| 7 | 26.165 | 24.812 | 0.392 | -0.407 |
| Cerebellum | 4 | 28.515 | 25.172 | 0.0985 | -1.007 |
| 8 | 28.295 | 24.650 | 0.0799 | -1.097 |
| 9 | 28.711 | 25.040 | 0.0785 | -1.105 |
| 6 | 28.512 | 25.003 | 0.0879 | -1.056 |
| Hypothalamus | 10 | 27.923 | 26.242 | 0.312 | -0.506 |
| 4 | 27.723 | 25.307 | 0.187 | -0.728 |
| 9 | 27.832 | 25.678 | 0.225 | -0.648 |
| 11 | 28.155 | 25.894 | 0.209 | -0.680 |
| MOGAT1 | Cortex | 1 | 29.777 | 26.554 | 0.107 | -0.971 |
| 2 | 29.270 | 25.547 | 0.0757 | -1.121 |
| 3 | 31.803 | 25.600 | 0.0136 | -1.866 |
| 4 | 29.239 | 25.788 | 0.0915 | -1.039 |
| Hippocampus | 10 | 29.993 | 25.688 | 0.0506 | -1.296 |
| 5 | 28.803 | 24.941 | 0.0688 | -1.162 |
| 6 | 29.133 | 25.509 | 0.0811 | -1.091 |
| 7 | 29.371 | 25.213 | 0.056 | -1.252 |
| Cerebellum | 4 | 28.677 | 25.942 | 0.15 | -0.824 |
| 8 | 28.083 | 24.760 | 0.0999 | -1.000 |
| 9 | 29.383 | 25.336 | 0.0605 | -1.218 |
| 6 | 30.487 | 25.410 | 0.0296 | -1.529 |
| Hypothalamus | 10 | 26.238 | 26.849 | 1.53 | 0.185 |
| 4 | 26.227 | 25.937 | 0.818 | -0.087 |
| 9 | 25.013 | 26.000 | 1.98 | 0.297 |
| 11 | 26.067 | 26.027 | 0.972 | -0.012 |
| MOGAT2 | Cortex | 1 | 33.922 | 26.554 | N/A | N/A |
| 2 | 33.274 | 25.547 |
| 3 | 33.596 | 25.600 |
| 4 | 34.594 | 25.788 |
| Hippocampus | 10 | 33.739 | 25.272 |
| 5 | 33.830 | 24.501 |
| 6 | 34.246 | 24.996 |
| 7 | 31.994 | 24.884 |
| Cerebellum | 4 | 34.918 | 25.942 |
| 8 | 33.325 | 24.760 |
| 9 | 34.900 | 25.336 |
| 6 | 35.210 | 25.410 |
| Hypothalamus | 10 | 35.156 | 26.849 |
| 4 | 34.484 | 25.937 |
| 9 | 31.791 | 26.000 |
| 11 | 31.383 | 26.027 |

The table shows the raw data of Figure 1 of the main manuscript. In the “mouse number” column, each number indicates a different mouse. All of the mice of this table are wild type mice from the background of the *Agpat2* mice (*Agpat2*+/+).

Ct refers to the cycle threshold obtained in the qPCR experiments. 2-ΔCT refers to the 2-ΔCT method (2-(CT target gene – CT reference gene)). Ct value cut off was 30. N/A: not applicable

# Table S2: Data obtained from qPCR experiments of Figure 2.

| Gene | Brain region | Genotype | Mouse number | Ct gene of interest | Ct Cyclophilin | 2-ΔΔCT | log10 (2-ΔΔCT ) |
| --- | --- | --- | --- | --- | --- | --- | --- |
|
| GPAT1 | Cortex | *Agpat2*+/+ | 1 | 27.765 | 26.106 | 1.023 | 0.009 |
| *Agpat2*+/+ | 2 | 27.452 | 25.688 | 0.952 | -0.021 |
| *Agpat2*+/+ | 3 | 29.059 | 27.398 | 1.022 | 0.009 |
| *Agpat2*+/+ | 4 | 27.658 | 25.970 | 1.003 | 0.000 |
| *Agpat2-*/- | 12 | 27.594 | 25.840 | 0.958 | -0.019 |
| *Agpat2-*/- | 13 | 27.306 | 25.489 | 0.918 | -0.037 |
| *Agpat2-*/- | 14 | 28.507 | 26.561 | 0.839 | -0.076 |
| *Agpat2-*/- | 15 | 28.742 | 26.560 | 0.712 | -0.148 |
| Hippocampus | *Agpat2*+/+ | 1 | 27.603 | 25.910 | 1.162 | 0.064 |
| *Agpat2*+/+ | 5 | 26.819 | 24.807 | 0.932 | -0.031 |
| *Agpat2*+/+ | 6 | 27.324 | 25.270 | 0.905 | -0.043 |
| *Agpat2*+/+ | 7 | 26.693 | 24.783 | 1.001 | 0.000 |
| *Agpat2-*/- | 12 | 27.781 | 25.488 | 0.767 | -0.115 |
| *Agpat2-*/- | 13 | 27.135 | 25.126 | 0.933 | -0.030 |
| *Agpat2-*/- | 14 | 27.920 | 25.819 | 0.876 | -0.057 |
| *Agpat2-*/- | 15 | 27.922 | 26.352 | 1.266 | 0.104 |
| Cerebellum | *Agpat2*+/+ | 4 | 28.710 | 27.709 | 1.248 | 0.097 |
| *Agpat2*+/+ | 8 | 26.925 | 25.436 | 0.891 | -0.050 |
| *Agpat2*+/+ | 9 | 27.305 | 25.900 | 0.943 | -0.025 |
| *Agpat2*+/+ | 6 | 27.317 | 25.872 | 0.918 | -0.037 |
| *Agpat2-*/- | 12 | 27.525 | 25.497 | 0.612 | -0.213 |
| *Agpat2-*/- | 13 | 27.092 | 25.452 | 0.802 | -0.096 |
| *Agpat2-*/- | 14 | 27.952 | 26.549 | 0.945 | -0.025 |
| *Agpat2-*/- | 15 | 27.853 | 26.859 | 1.254 | 0.097 |
| Hypothalamus | *Agpat2*+/+ | 10 | 27.802 | 26.995 | 1.101 | 0.041 |
| *Agpat2*+/+ | 4 | 27.688 | 26.757 | 1.011 | 0.004 |
| *Agpat2*+/+ | 9 | 28.084 | 27.015 | 0.918 | -0.037 |
| *Agpat2*+/+ | 11 | 27.460 | 26.470 | 0.970 | -0.013 |
| *Agpat2-*/- | 13 | 26.944 | 25.410 | 0.666 | -0.177 |
| *Agpat2-*/- | 15 | 27.964 | 26.530 | 0.713 | -0.147 |
| *Agpat2-*/- | 16 | 27.952 | 26.768 | 0.848 | -0.072 |
| *Agpat2-*/- | 17 | 27.683 | 26.590 | 0.903 | -0.044 |
| AGPAT1 | Cortex | *Agpat2*+/+ | 1 | 25.945 | 26.106 | 1.118 | 0.049 |
| *Agpat2*+/+ | 2 | 25.841 | 25.688 | 0.900 | -0.046 |
| *Agpat2*+/+ | 3 | 27.295 | 27.398 | 1.074 | 0.029 |
| *Agpat2*+/+ | 4 | 26.109 | 25.970 | 0.908 | -0.042 |
| *Agpat2-*/- | 12 | 25.815 | 25.840 | 1.018 | 0.009 |
| *Agpat2-*/- | 13 | 25.964 | 25.489 | 0.720 | -0.143 |
| *Agpat2-*/- | 14 | 26.784 | 26.561 | 0.857 | -0.067 |
| *Agpat2-*/- | 15 | 26.580 | 26.560 | 0.986 | -0.006 |
| Hippocampus | *Agpat2*+/+ | 1 | 25.820 | 25.910 | 1.175 | 0.072 |
| *Agpat2*+/+ | 5 | 24.979 | 24.807 | 0.980 | -0.009 |
| *Agpat2*+/+ | 6 | 25.583 | 25.270 | 0.889 | -0.051 |
| *Agpat2*+/+ | 7 | 24.992 | 24.783 | 0.956 | -0.020 |
| *Agpat2-*/- | 12 | 25.870 | 25.488 | 0.847 | -0.072 |
| *Agpat2-*/- | 13 | 25.927 | 25.126 | 0.634 | -0.198 |
| *Agpat2-*/- | 14 | 26.871 | 25.819 | 0.533 | -0.273 |
| *Agpat2-*/- | 15 | 26.434 | 26.352 | 1.043 | 0.017 |
| Cerebellum | *Agpat2*+/+ | 4 | 27.826 | 27.709 | 1.351 | 0.130 |
| *Agpat2*+/+ | 8 | 26.034 | 25.436 | 0.968 | -0.014 |
| *Agpat2*+/+ | 9 | 26.632 | 25.900 | 0.882 | -0.055 |
| *Agpat2*+/+ | 6 | 26.748 | 25.872 | 0.799 | -0.097 |
| *Agpat2-*/- | 12 | 26.211 | 25.497 | 0.893 | -0.049 |
| *Agpat2-*/- | 13 | 26.367 | 25.452 | 0.777 | -0.110 |
| *Agpat2-*/- | 14 | 27.299 | 26.549 | 0.872 | -0.059 |
| *Agpat2-*/- | 15 | 27.274 | 26.859 | 1.099 | 0.041 |
| Hypothalamus | *Agpat2*+/+ | 10 | 26.507 | 26.995 | 1.172 | 0.068 |
| *Agpat2*+/+ | 4 | 26.422 | 26.757 | 1.053 | 0.021 |
| *Agpat2*+/+ | 9 | 26.934 | 27.015 | 0.884 | -0.054 |
| *Agpat2*+/+ | 11 | 26.377 | 26.470 | 0.891 | -0.050 |
| *Agpat2-*/- | 13 | 25.820 | 25.410 | 0.629 | -0.201 |
| *Agpat2-*/- | 15 | 26.706 | 26.530 | 0.739 | -0.131 |
| *Agpat2-*/- | 16 | 26.515 | 26.768 | 0.996 | -0.002 |
| *Agpat2-*/- | 17 | 26.458 | 26.590 | 0.915 | -0.039 |
| AGPAT2 | Cortex | *Agpat2*+/+ | 1 | 28.215 | 26.106 | 0.751 | -0.124 |
| *Agpat2*+/+ | 2 | 27.526 | 25.688 | 0.906 | -0.043 |
| *Agpat2*+/+ | 3 | 28.624 | 27.398 | 1.385 | 0.140 |
| *Agpat2*+/+ | 4 | 27.727 | 25.970 | 0.958 | -0.019 |
| *Agpat2-*/- | 12 | undetermined | 25.840 | N/A | N/A |
| *Agpat2-*/- | 13 | undetermined | 25.489 | N/A | N/A |
| *Agpat2-*/- | 14 | undetermined | 26.561 | N/A | N/A |
| *Agpat2-*/- | 15 | undetermined | 26.560 | N/A | N/A |
| Hippocampus | *Agpat2*+/+ | 1 | 31.896 | 25.910 | 0.826 | -0.083 |
| *Agpat2*+/+ | 5 | 30.304 | 24.807 | 1.160 | 0.064 |
| *Agpat2*+/+ | 6 | 30.833 | 25.270 | 1.108 | 0.045 |
| *Agpat2*+/+ | 7 | 30.635 | 24.783 | 0.907 | -0.042 |
| *Agpat2-*/- | 12 | undetermined | 25.488 | N/A | N/A |
| *Agpat2-*/- | 13 | undetermined | 25.126 | N/A | N/A |
| *Agpat2-*/- | 14 | undetermined | 25.819 | N/A | N/A |
| *Agpat2-*/- | 15 | undetermined | 26.352 | N/A | N/A |
| Cerebellum | *Agpat2*+/+ | 4 | 28.630 | 27.709 | 1.382 | 0.140 |
| *Agpat2*+/+ | 8 | 26.894 | 25.436 | 0.952 | -0.021 |
| *Agpat2*+/+ | 9 | 27.617 | 25.900 | 0.795 | -0.100 |
| *Agpat2*+/+ | 6 | 27.459 | 25.872 | 0.871 | -0.060 |
| *Agpat2-*/- | 12 | undetermined | 25.497 | N/A | N/A |
| *Agpat2-*/- | 13 | undetermined | 25.452 | N/A | N/A |
| *Agpat2-*/- | 14 | undetermined | 26.549 | N/A | N/A |
| *Agpat2-*/- | 15 | undetermined | 26.859 | N/A | N/A |
| Hypothalamus | *Agpat2*+/+ | 10 | 31.742 | 26.995 | 1.078 | 0.033 |
| *Agpat2*+/+ | 4 | 31.516 | 26.757 | 1.069 | 0.029 |
| *Agpat2*+/+ | 9 | 31.790 | 27.015 | 1.058 | 0.025 |
| *Agpat2*+/+ | 11 | 31.657 | 26.470 | 0.795 | -0.100 |
| *Agpat2-*/- | 13 | undetermined | 25.410 | N/A | N/A |
| *Agpat2-*/- | 15 | undetermined | 26.530 | N/A | N/A |
| *Agpat2-*/- | 16 | undetermined | 26.768 | N/A | N/A |
| *Agpat2-*/- | 17 | undetermined | 26.590 | N/A | N/A |
| AGPAT3 | Cortex | *Agpat2*+/+ | 1 | 25.568 | 26.040 | 1.282 | 0.107 |
| *Agpat2*+/+ | 2 | 25.565 | 25.637 | 0.971 | -0.013 |
| *Agpat2*+/+ | 3 | 27.241 | 26.906 | 0.733 | -0.135 |
| *Agpat2*+/+ | 4 | 25.769 | 25.903 | 1.014 | 0.004 |
| *Agpat2-*/- | 12 | 25.861 | 25.894 | 0.945 | -0.025 |
| *Agpat2-*/- | 13 | 25.414 | 25.881 | 1.277 | 0.107 |
| *Agpat2-*/- | 14 | 26.640 | 26.267 | 0.714 | -0.146 |
| *Agpat2-*/- | 15 | 26.536 | 26.866 | 1.162 | 0.064 |
| Hippocampus | *Agpat2*+/+ | 1 | 21.302 | 25.845 | 1.035 | 0.013 |
| *Agpat2*+/+ | 5 | 20.369 | 24.823 | 0.972 | -0.012 |
| *Agpat2*+/+ | 6 | 20.817 | 25.412 | 1.072 | 0.029 |
| *Agpat2*+/+ | 7 | 20.540 | 24.915 | 0.921 | -0.036 |
| *Agpat2-*/- | 12 | 21.460 | 25.753 | 0.870 | -0.060 |
| *Agpat2-*/- | 13 | 20.945 | 25.213 | 0.855 | -0.068 |
| *Agpat2-*/- | 14 | 21.841 | 25.869 | 0.724 | -0.140 |
| *Agpat2-*/- | 15 | 22.131 | 26.327 | 0.813 | -0.090 |
| Cerebellum | *Agpat2*+/+ | 4 | 26.624 | 27.047 | 1.041 | 0.017 |
| *Agpat2*+/+ | 8 | 24.924 | 25.539 | 1.189 | 0.076 |
| *Agpat2*+/+ | 9 | 25.538 | 25.613 | 0.818 | -0.087 |
| *Agpat2*+/+ | 6 | 25.519 | 25.815 | 0.953 | -0.021 |
| *Agpat2-*/- | 12 | 25.411 | 25.209 | 0.675 | -0.171 |
| *Agpat2-*/- | 13 | 25.164 | 25.436 | 0.937 | -0.028 |
| *Agpat2-*/- | 14 | 26.829 | 26.628 | 0.675 | -0.171 |
| *Agpat2-*/- | 15 | 26.154 | 26.703 | 1.136 | 0.057 |
| Hypothalamus | *Agpat2*+/+ | 10 | 21.835 | 26.893 | 1.079 | 0.033 |
| *Agpat2*+/+ | 4 | 21.950 | 26.924 | 1.018 | 0.009 |
| *Agpat2*+/+ | 9 | 22.271 | 27.276 | 1.040 | 0.017 |
| *Agpat2*+/+ | 11 | 21.885 | 26.621 | 0.863 | -0.064 |
| *Agpat2-*/- | 13 | 21.503 | 25.518 | 0.524 | -0.281 |
| *Agpat2-*/- | 15 | 22.376 | 26.643 | 0.624 | -0.205 |
| *Agpat2-*/- | 16 | 21.977 | 26.903 | 0.984 | -0.007 |
| *Agpat2-*/- | 17 | 21.993 | 26.514 | 0.744 | -0.128 |
| AGPAT4 | Cortex | *Agpat2*+/+ | 1 | 27.311 | 26.040 | 1.269 | 0.104 |
| *Agpat2*+/+ | 2 | 27.099 | 25.637 | 1.112 | 0.045 |
| *Agpat2*+/+ | 3 | 28.724 | 26.906 | 0.869 | -0.061 |
| *Agpat2*+/+ | 4 | 27.931 | 25.903 | 0.751 | -0.124 |
| *Agpat2-*/- | 12 | 27.112 | 25.894 | 1.316 | 0.121 |
| *Agpat2-*/- | 13 | 27.094 | 25.881 | 1.321 | 0.121 |
| *Agpat2-*/- | 14 | 28.199 | 26.267 | 0.803 | -0.095 |
| *Agpat2-*/- | 15 | 28.138 | 26.866 | 1.268 | 0.104 |
| Hippocampus | *Agpat2*+/+ | 1 | 26.755 | 25.845 | 1.140 | 0.057 |
| *Agpat2*+/+ | 5 | 26.029 | 24.823 | 0.929 | -0.032 |
| *Agpat2*+/+ | 6 | 26.633 | 25.412 | 0.919 | -0.037 |
| *Agpat2*+/+ | 7 | 25.997 | 24.915 | 1.012 | 0.004 |
| *Agpat2-*/- | 12 | 26.866 | 25.753 | 0.990 | -0.004 |
| *Agpat2-*/- | 13 | 26.917 | 25.213 | 0.657 | -0.182 |
| *Agpat2-*/- | 14 | 27.528 | 25.869 | 0.678 | -0.169 |
| *Agpat2-*/- | 15 | 27.617 | 26.327 | 0.876 | -0.057 |
| Cerebellum | *Agpat2*+/+ | 4 | 28.774 | 27.047 | 1.041 | 0.017 |
| *Agpat2*+/+ | 8 | 27.181 | 25.539 | 1.105 | 0.041 |
| *Agpat2*+/+ | 9 | 27.533 | 25.613 | 0.911 | -0.040 |
| *Agpat2*+/+ | 6 | 27.686 | 25.815 | 0.943 | -0.025 |
| *Agpat2-*/- | 12 | 27.826 | 25.209 | 0.562 | -0.250 |
| *Agpat2-*/- | 13 | 27.482 | 25.436 | 0.835 | -0.078 |
| *Agpat2-*/- | 14 | 28.423 | 26.628 | 0.993 | -0.003 |
| *Agpat2-*/- | 15 | 28.836 | 26.703 | 0.786 | -0.105 |
| Hypothalamus | *Agpat2*+/+ | 10 | 27.608 | 26.893 | 0.984 | -0.007 |
| *Agpat2*+/+ | 4 | 27.599 | 26.924 | 1.012 | 0.004 |
| *Agpat2*+/+ | 9 | 27.956 | 27.276 | 1.008 | 0.004 |
| *Agpat2*+/+ | 11 | 27.316 | 26.621 | 0.997 | -0.001 |
| *Agpat2-*/- | 13 | 26.300 | 25.518 | 0.939 | -0.027 |
| *Agpat2-*/- | 15 | 27.799 | 26.643 | 0.724 | -0.140 |
| *Agpat2-*/- | 16 | 27.715 | 26.903 | 0.920 | -0.036 |
| *Agpat2-*/- | 17 | 27.674 | 26.514 | 0.723 | -0.141 |
| LIPIN1 | Cortex | *Agpat2*+/+ | 1 | 29.294 | 26.040 | 1.299 | 0.114 |
| *Agpat2*+/+ | 2 | 29.431 | 25.637 | 0.893 | -0.049 |
| *Agpat2*+/+ | 3 | 30.417 | 26.906 | 1.087 | 0.037 |
| *Agpat2*+/+ | 4 | 30.006 | 25.903 | 0.721 | -0.142 |
| *Agpat2-*/- | 12 | 28.861 | 25.894 | 1.584 | 0.199 |
| *Agpat2-*/- | 13 | 28.273 | 25.881 | 2.360 | 0.373 |
| *Agpat2-*/- | 14 | 29.534 | 26.267 | 1.287 | 0.111 |
| *Agpat2-*/- | 15 | 29.403 | 26.866 | 2.135 | 0.330 |
| Hippocampus | *Agpat2*+/+ | 1 | 29.441 | 25.845 | 1.244 | 0.093 |
| *Agpat2*+/+ | 5 | 29.282 | 24.823 | 0.684 | -0.165 |
| *Agpat2*+/+ | 6 | 29.276 | 25.412 | 1.033 | 0.013 |
| *Agpat2*+/+ | 7 | 28.772 | 24.915 | 1.039 | 0.017 |
| *Agpat2-*/- | 12 | 29.080 | 25.753 | 1.499 | 0.176 |
| *Agpat2-*/- | 13 | 28.591 | 25.213 | 1.446 | 0.161 |
| *Agpat2-*/- | 14 | 29.488 | 25.869 | 1.224 | 0.086 |
| *Agpat2-*/- | 15 | 29.609 | 26.327 | 1.547 | 0.190 |
| Cerebellum | *Agpat2*+/+ | 4 | 30.491 | 27.047 | 0.691 | -0.161 |
| *Agpat2*+/+ | 8 | 28.033 | 25.539 | 1.335 | 0.124 |
| *Agpat2*+/+ | 9 | 28.676 | 25.613 | 0.899 | -0.046 |
| *Agpat2*+/+ | 6 | 28.622 | 25.815 | 1.074 | 0.029 |
| *Agpat2-*/- | 12 | 27.756 | 25.209 | 1.287 | 0.111 |
| *Agpat2-*/- | 13 | 27.546 | 25.436 | 1.741 | 0.241 |
| *Agpat2-*/- | 14 | 28.629 | 26.628 | 1.878 | 0.274 |
| *Agpat2-*/- | 15 | 28.888 | 26.703 | 1.654 | 0.217 |
| Hypothalamus | *Agpat2*+/+ | 10 | 30.207 | 26.893 | 0.707 | -0.151 |
| *Agpat2*+/+ | 4 | 30.174 | 26.924 | 0.739 | -0.131 |
| *Agpat2*+/+ | 9 | 29.928 | 27.276 | 1.119 | 0.049 |
| *Agpat2*+/+ | 11 | 28.913 | 26.621 | 1.435 | 0.158 |
| *Agpat2-*/- | 13 | 27.730 | 25.518 | 1.518 | 0.182 |
| *Agpat2-*/- | 15 | 28.871 | 26.643 | 1.501 | 0.176 |
| *Agpat2-*/- | 16 | 28.682 | 26.903 | 2.048 | 0.312 |
| *Agpat2-*/- | 17 | 28.661 | 26.514 | 1.588 | 0.201 |
| LIPIN2 | Cortex | *Agpat2*+/+ | 1 | 27.814 | 26.040 | 1.258 | 0.100 |
| *Agpat2*+/+ | 2 | 27.853 | 25.637 | 0.926 | -0.033 |
| *Agpat2*+/+ | 3 | 29.429 | 26.906 | 0.748 | -0.126 |
| *Agpat2*+/+ | 4 | 27.912 | 25.903 | 1.068 | 0.029 |
| *Agpat2-*/- | 12 | 27.876 | 25.894 | 1.089 | 0.037 |
| *Agpat2-*/- | 13 | 27.551 | 25.881 | 1.352 | 0.130 |
| *Agpat2-*/- | 14 | 28.865 | 26.267 | 0.710 | -0.149 |
| *Agpat2-*/- | 15 | 28.808 | 26.866 | 1.120 | 0.049 |
| Hippocampus | *Agpat2*+/+ | 1 | 27.622 | 25.845 | 1.153 | 0.061 |
| *Agpat2*+/+ | 5 | 27.015 | 24.823 | 0.865 | -0.063 |
| *Agpat2*+/+ | 6 | 27.397 | 25.412 | 0.998 | -0.001 |
| *Agpat2*+/+ | 7 | 26.922 | 24.915 | 0.983 | -0.007 |
| *Agpat2-*/- | 12 | 27.850 | 25.753 | 0.924 | -0.034 |
| *Agpat2-*/- | 13 | 27.302 | 25.213 | 0.928 | -0.032 |
| *Agpat2-*/- | 14 | 28.232 | 25.869 | 0.768 | -0.115 |
| *Agpat2-*/- | 15 | 28.351 | 26.327 | 0.972 | -0.012 |
| Cerebellum | *Agpat2*+/+ | 4 | 29.540 | 27.047 | 1.009 | 0.004 |
| *Agpat2*+/+ | 8 | 27.778 | 25.539 | 1.204 | 0.079 |
| *Agpat2*+/+ | 9 | 28.491 | 25.613 | 0.773 | -0.112 |
| *Agpat2*+/+ | 6 | 28.300 | 25.815 | 1.015 | 0.004 |
| *Agpat2-*/- | 12 | 27.693 | 25.209 | 1.015 | 0.009 |
| *Agpat2-*/- | 13 | 27.927 | 25.436 | 1.010 | 0.004 |
| *Agpat2-*/- | 14 | 28.691 | 26.628 | 1.359 | 0.134 |
| *Agpat2-*/- | 15 | 28.895 | 26.703 | 1.243 | 0.093 |
| Hypothalamus | *Agpat2*+/+ | 10 | 28.411 | 26.893 | 0.957 | -0.019 |
| *Agpat2*+/+ | 4 | 28.432 | 26.924 | 0.964 | -0.016 |
| *Agpat2*+/+ | 9 | 28.481 | 27.276 | 1.188 | 0.076 |
| *Agpat2*+/+ | 11 | 28.241 | 26.621 | 0.891 | -0.050 |
| *Agpat2-*/- | 13 | 27.174 | 25.518 | 0.870 | -0.060 |
| *Agpat2-*/- | 15 | 28.575 | 26.643 | 0.718 | -0.144 |
| *Agpat2-*/- | 16 | 28.330 | 26.903 | 1.019 | 0.009 |
| *Agpat2-*/- | 17 | 28.252 | 26.514 | 0.821 | -0.086 |
| DGAT1 | Cortex | *Agpat2*+/+ | 1 | 30.393 | 26.326 | 1.060 | 0.025 |
| *Agpat2*+/+ | 2 | 29.645 | 25.082 | 0.752 | -0.124 |
| *Agpat2*+/+ | 3 | 29.281 | 25.307 | 1.130 | 0.053 |
| *Agpat2*+/+ | 4 | 29.175 | 25.107 | 1.059 | 0.025 |
| *Agpat2-*/- | 12 | 29.409 | 25.014 | 0.844 | -0.074 |
| *Agpat2-*/- | 13 | 28.888 | 24.692 | 0.969 | -0.014 |
| *Agpat2-*/- | 14 | 30.941 | 25.932 | 0.551 | -0.259 |
| *Agpat2-*/- | 15 | 31.954 | 26.165 | 0.321 | -0.493 |
| Hippocampus | *Agpat2*+/+ | 1 | 30.492 | 25.142 | 0.655 | -0.184 |
| *Agpat2*+/+ | 5 | 28.992 | 24.513 | 1.197 | 0.079 |
| *Agpat2*+/+ | 6 | 29.545 | 24.904 | 1.070 | 0.029 |
| *Agpat2*+/+ | 7 | 29.441 | 24.812 | 1.078 | 0.033 |
| *Agpat2-*/- | 12 | 29.927 | 25.049 | 0.907 | -0.042 |
| *Agpat2-*/- | 13 | 29.149 | 24.479 | 1.048 | 0.021 |
| *Agpat2-*/- | 14 | 30.798 | 25.447 | 0.654 | -0.184 |
| *Agpat2-*/- | 15 | 31.232 | 25.962 | 0.692 | -0.160 |
| Cerebellum | *Agpat2*+/+ | 4 | 29.168 | 25.172 | 0.959 | -0.018 |
| *Agpat2*+/+ | 8 | 28.730 | 24.650 | 0.905 | -0.043 |
| *Agpat2*+/+ | 9 | 28.823 | 25.040 | 1.113 | 0.045 |
| *Agpat2*+/+ | 6 | 28.909 | 25.003 | 1.022 | 0.009 |
| *Agpat2-*/- | 12 | 28.717 | 24.876 | 1.069 | 0.029 |
| *Agpat2-*/- | 13 | 28.538 | 24.874 | 1.208 | 0.083 |
| *Agpat2-*/- | 14 | 30.596 | 25.944 | 0.609 | -0.215 |
| *Agpat2-*/- | 15 | 30.870 | 26.115 | 0.567 | -0.246 |
| Hypothalamus | *Agpat2*+/+ | 10 | 30.778 | 26.242 | 1.061 | 0.025 |
| *Agpat2*+/+ | 4 | 30.207 | 25.307 | 0.825 | -0.084 |
| *Agpat2*+/+ | 9 | 30.151 | 25.678 | 1.109 | 0.045 |
| *Agpat2*+/+ | 11 | 30.510 | 25.894 | 1.004 | 0.000 |
| *Agpat2-*/- | 13 | 28.996 | 25.046 | 1.593 | 0.201 |
| *Agpat2-*/- | 15 | 30.808 | 26.238 | 1.036 | 0.017 |
| *Agpat2-*/- | 16 | 31.814 | 26.943 | 0.842 | -0.075 |
| *Agpat2-*/- | 17 | 31.208 | 26.203 | 0.767 | -0.115 |
| DGAT2 | Cortex | *Agpat2*+/+ | 1 | 27.146 | 26.040 | 1.173 | 0.068 |
| *Agpat2*+/+ | 2 | 27.100 | 25.637 | 0.916 | -0.038 |
| *Agpat2*+/+ | 3 | 28.442 | 26.906 | 0.870 | -0.060 |
| *Agpat2*+/+ | 4 | 27.180 | 25.903 | 1.041 | 0.017 |
| *Agpat2-*/- | 12 | 27.420 | 25.894 | 0.876 | -0.057 |
| *Agpat2-*/- | 13 | 27.234 | 25.881 | 0.988 | -0.005 |
| *Agpat2-*/- | 14 | 27.934 | 26.267 | 0.795 | -0.100 |
| *Agpat2-*/- | 15 | 27.835 | 26.866 | 1.289 | 0.111 |
| Hippocampus | *Agpat2*+/+ | 1 | 26.525 | 25.845 | 1.223 | 0.086 |
| *Agpat2*+/+ | 5 | 25.930 | 24.823 | 0.910 | -0.041 |
| *Agpat2*+/+ | 6 | 26.438 | 25.412 | 0.962 | -0.017 |
| *Agpat2*+/+ | 7 | 26.029 | 24.915 | 0.906 | -0.043 |
| *Agpat2-*/- | 12 | 26.662 | 25.753 | 1.044 | 0.017 |
| *Agpat2-*/- | 13 | 26.237 | 25.213 | 0.964 | -0.016 |
| *Agpat2-*/- | 14 | 27.128 | 25.869 | 0.818 | -0.087 |
| *Agpat2-*/- | 15 | 27.505 | 26.327 | 0.866 | -0.062 |
| Cerebellum | *Agpat2*+/+ | 4 | 30.373 | 26.818 | 0.957 | -0.019 |
| *Agpat2*+/+ | 8 | 28.835 | 25.302 | 0.971 | -0.013 |
| *Agpat2*+/+ | 9 | 29.019 | 25.587 | 1.042 | 0.017 |
| *Agpat2*+/+ | 6 | 29.201 | 25.753 | 1.030 | 0.013 |
| *Agpat2-*/- | 12 | 28.927 | 25.256 | 0.883 | -0.054 |
| *Agpat2-*/- | 13 | 29.021 | 25.259 | 0.829 | -0.081 |
| *Agpat2-*/- | 14 | 29.531 | 26.421 | 1.303 | 0.114 |
| *Agpat2-*/- | 15 | 29.936 | 26.863 | 1.336 | 0.127 |
| Hypothalamus | *Agpat2*+/+ | 10 | 28.539 | 26.995 | 1.453 | 0.161 |
| *Agpat2*+/+ | 4 | 28.998 | 26.757 | 0.896 | -0.048 |
| *Agpat2*+/+ | 9 | 29.354 | 27.015 | 0.837 | -0.077 |
| *Agpat2*+/+ | 11 | 28.851 | 26.470 | 0.813 | -0.090 |
| *Agpat2-*/- | 13 | 28.235 | 25.410 | 0.598 | -0.223 |
| *Agpat2-*/- | 15 | 29.154 | 26.530 | 0.687 | -0.163 |
| *Agpat2-*/- | 16 | 28.929 | 26.768 | 0.947 | -0.024 |
| *Agpat2-*/- | 17 | 29.342 | 26.590 | 0.629 | -0.201 |
| MOGAT1 | Cortex | *Agpat2*+/+ | 1 | 29.777 | 26.554 | 1.488 | 0.173 |
| *Agpat2*+/+ | 2 | 29.270 | 25.547 | 1.053 | 0.021 |
| *Agpat2*+/+ | 3 | 31.803 | 25.600 | 0.189 | -0.724 |
| *Agpat2*+/+ | 4 | 29.239 | 25.788 | 1.271 | 0.104 |
| *Agpat2-*/- | 12 | 33.660 | 25.014 | 0.035 | -1.460 |
| *Agpat2-*/- | 13 | 34.440 | 24.692 | 0.016 | -1.790 |
| *Agpat2-*/- | 14 | 37.075 | 25.932 | 0.006 | -2.212 |
| *Agpat2-*/- | 15 | 30.976 | 26.165 | 0.495 | -0.305 |
| Hippocampus | *Agpat2*+/+ | 1 | 29.993 | 25.688 | 0.789 | -0.103 |
| *Agpat2*+/+ | 5 | 28.803 | 24.941 | 1.073 | 0.029 |
| *Agpat2*+/+ | 6 | 29.133 | 25.509 | 1.265 | 0.100 |
| *Agpat2*+/+ | 7 | 29.371 | 25.213 | 0.873 | -0.059 |
| *Agpat2-*/- | 12 | 29.735 | 26.114 | 1.267 | 0.104 |
| *Agpat2-*/- | 13 | 31.388 | 25.935 | 0.356 | -0.449 |
| *Agpat2-*/- | 14 | 29.580 | 25.447 | 0.888 | -0.052 |
| *Agpat2-*/- | 15 | 30.030 | 25.962 | 0.930 | -0.032 |
| Cerebellum | *Agpat2*+/+ | 4 | 28.677 | 25.942 | 1.766 | 0.248 |
| *Agpat2*+/+ | 8 | 28.083 | 24.760 | 1.174 | 0.068 |
| *Agpat2*+/+ | 9 | 29.383 | 25.336 | 0.711 | -0.148 |
| *Agpat2*+/+ | 6 | 30.487 | 25.410 | 0.348 | -0.458 |
| *Agpat2-*/- | 12 | 34.313 | 24.876 | 0.017 | -1.770 |
| *Agpat2-*/- | 13 | 33.854 | 24.874 | 0.023 | -1.633 |
| *Agpat2-*/- | 14 | 33.912 | 25.944 | 0.047 | -1.328 |
| *Agpat2-*/- | 15 | 30.414 | 26.115 | 0.597 | -0.224 |
| Hypothalamus | *Agpat2*+/+ | 10 | 26.238 | 26.849 | 1.153 | 0.061 |
| *Agpat2*+/+ | 4 | 26.227 | 25.937 | 0.617 | -0.210 |
| *Agpat2*+/+ | 9 | 25.013 | 26.000 | 1.496 | 0.176 |
| *Agpat2*+/+ | 11 | 26.067 | 26.027 | 0.734 | -0.134 |
| *Agpat2-*/- | 13 | 30.924 | 25.046 | 0.013 | -1.893 |
| *Agpat2-*/- | 15 | 28.544 | 26.238 | 0.153 | -0.815 |
| *Agpat2-*/- | 16 | 28.719 | 26.943 | 0.220 | -0.658 |
| *Agpat2-*/- | 17 | 27.657 | 26.203 | 0.276 | -0.559 |

The table shows the raw data of Figure 2 of the main manuscript. In the “mouse number” column, each number indicates a different mouse. Ct refers to the cycle threshold obtained in the qPCR experiments. 2-ΔΔCT refers to the 2-ΔΔCT method (2-(ΔCT test samples – ΔCT calibrator samples)). N/A: not applicable

# Table S3: Data obtained from qPCR experiments of Figure 3.

| Gene | Brain region | Genotype | Mouse number | Ct gene of interest | Ct Cyclophilin | 2-ΔΔCT | log10 (2-ΔΔCT ) |
| --- | --- | --- | --- | --- | --- | --- | --- |
|
| GPAT1 | Cortex | *Lepr*+/+ | 18 | 28.352 | 26.074 | 0.732 | -0.135 |
| *Lepr*+/+ | 19 | 28.474 | 26.564 | 0.944 | -0.025 |
| *Lepr*+/+ | 20 | 27.834 | 26.297 | 1.224 | 0.086 |
| *Lepr*+/+ | 21 | 27.917 | 26.225 | 1.100 | 0.041 |
| *Leprdb*/db | 24 | 28.277 | 27.091 | 1.561 | 0.193 |
| *Leprdb*/db | 25 | 28.500 | 26.693 | 1.014 | 0.004 |
| *Leprdb*/db | 26 | 28.461 | 26.480 | 0.899 | -0.046 |
| *Leprdb*/db | 27 | 28.278 | 26.314 | 0.910 | -0.041 |
| Hippocampus | *Lepr*+/+ | 19 | 28.339 | 26.474 | 0.952 | -0.021 |
| *Lepr*+/+ | 20 | 28.472 | 26.792 | 1.082 | 0.033 |
| *Lepr*+/+ | 21 | 27.712 | 25.947 | 1.020 | 0.009 |
| *Lepr*+/+ | 22 | 27.878 | 26.005 | 0.946 | -0.024 |
| *Leprdb*/db | 25 | 28.069 | 26.631 | 1.279 | 0.107 |
| *Leprdb*/db | 28 | 28.240 | 26.572 | 1.091 | 0.037 |
| *Leprdb*/db | 26 | 27.778 | 25.751 | 0.850 | -0.071 |
| *Leprdb*/db | 27 | 27.567 | 25.996 | 1.166 | 0.068 |
| Cerebellum | *Lepr*+/+ | 20 | 28.680 | 26.720 | 0.932 | -0.031 |
| *Lepr*+/+ | 22 | 28.632 | 26.443 | 0.795 | -0.100 |
| *Lepr*+/+ | 21 | 27.799 | 26.191 | 1.189 | 0.076 |
| *Lepr*+/+ | 23 | 27.968 | 26.226 | 1.084 | 0.033 |
| *Leprdb*/db | 29 | 28.207 | 26.869 | 1.434 | 0.155 |
| *Leprdb*/db | 28 | 28.499 | 27.175 | 1.448 | 0.161 |
| *Leprdb*/db | 26 | 27.898 | 26.267 | 1.170 | 0.068 |
| *Leprdb*/db | 27 | 27.539 | 26.422 | 1.671 | 0.223 |
| Hypothalamus | *Lepr*+/+ | 19 | 27.281 | 27.493 | 1.042 | 0.017 |
| *Lepr*+/+ | 22 | 27.313 | 27.323 | 0.906 | -0.043 |
| *Lepr*+/+ | 21 | 26.424 | 26.550 | 0.981 | -0.008 |
| *Lepr*+/+ | 23 | 26.862 | 27.115 | 1.071 | 0.029 |
| *Leprdb*/db | 25 | 27.450 | 28.046 | 1.359 | 0.134 |
| *Leprdb*/db | 28 | 27.203 | 27.391 | 1.024 | 0.009 |
| *Leprdb*/db | 26 | 26.929 | 26.819 | 0.833 | -0.079 |
| *Leprdb*/db | 27 | 26.591 | 26.989 | 1.185 | 0.072 |
| AGPAT1 | Cortex | *Lepr*+/+ | 18 | 26.562 | 26.907 | 0.994 | -0.003 |
| *Lepr*+/+ | 19 | 26.798 | 26.909 | 0.845 | -0.073 |
| *Lepr*+/+ | 20 | 26.690 | 27.195 | 1.111 | 0.045 |
| *Lepr*+/+ | 21 | 26.479 | 26.902 | 1.050 | 0.021 |
| *Leprdb*/db | 24 | 27.176 | 27.646 | 1.085 | 0.033 |
| *Leprdb*/db | 25 | 26.723 | 26.897 | 0.883 | -0.054 |
| *Leprdb*/db | 26 | 26.890 | 27.037 | 0.867 | -0.062 |
| *Leprdb*/db | 27 | 26.759 | 26.942 | 0.889 | -0.051 |
| Hippocampus | *Lepr*+/+ | 19 | 27.039 | 27.237 | 0.973 | -0.012 |
| *Lepr*+/+ | 20 | 27.033 | 27.118 | 0.899 | -0.046 |
| *Lepr*+/+ | 21 | 26.321 | 26.598 | 1.028 | 0.013 |
| *Lepr*+/+ | 22 | 26.468 | 26.842 | 1.100 | 0.041 |
| *Leprdb*/db | 25 | 27.382 | 27.351 | 0.830 | -0.081 |
| *Leprdb*/db | 28 | 26.852 | 27.073 | 0.988 | -0.005 |
| *Leprdb*/db | 26 | 26.079 | 26.282 | 0.977 | -0.010 |
| *Leprdb*/db | 27 | 26.602 | 26.603 | 0.849 | -0.071 |
| Cerebellum | *Lepr*+/+ | 20 | 27.635 | 27.266 | 0.914 | -0.039 |
| *Lepr*+/+ | 22 | 27.027 | 26.856 | 1.048 | 0.021 |
| *Lepr*+/+ | 21 | 26.895 | 26.841 | 1.136 | 0.057 |
| *Lepr*+/+ | 23 | 27.133 | 26.745 | 0.902 | -0.045 |
| *Leprdb*/db | 29 | 27.828 | 27.590 | 1.001 | 0.000 |
| *Leprdb*/db | 28 | 27.351 | 27.177 | 1.046 | 0.021 |
| *Leprdb*/db | 26 | 26.880 | 26.628 | 0.990 | -0.004 |
| *Leprdb*/db | 27 | 26.963 | 26.901 | 1.130 | 0.053 |
| Hypothalamus | *Lepr*+/+ | 19 | 27.199 | 27.280 | 0.912 | -0.040 |
| *Lepr*+/+ | 22 | 26.688 | 27.094 | 1.142 | 0.057 |
| *Lepr*+/+ | 21 | 26.300 | 26.510 | 0.998 | -0.001 |
| *Lepr*+/+ | 23 | 27.131 | 27.267 | 0.948 | -0.023 |
| *Leprdb*/db | 25 | 27.818 | 28.073 | 1.029 | 0.013 |
| *Leprdb*/db | 28 | 27.026 | 27.047 | 0.875 | -0.058 |
| *Leprdb*/db | 26 | 26.945 | 26.981 | 0.884 | -0.054 |
| *Leprdb*/db | 27 | 26.816 | 27.066 | 1.026 | 0.013 |
| AGPAT2 | Cortex | *Lepr*+/+ | 18 | 31.295 | 26.486 | 1.301 | 0.114 |
| *Lepr*+/+ | 19 | 32.149 | 26.574 | 0.765 | -0.116 |
| *Lepr*+/+ | 20 | 32.277 | 26.728 | 0.935 | -0.029 |
| *Lepr*+/+ | 21 | undetermined | 26.991 | N/A | -0.109 |
| *Leprdb*/db | 24 | 32.878 | 27.674 | 0.989 | -0.005 |
| *Leprdb*/db | 25 | 31.106 | 26.388 | 1.385 | 0.143 |
| *Leprdb*/db | 26 | 33.217 | 27.243 | 0.580 | -0.237 |
| *Leprdb*/db | 27 | 31.676 | 26.724 | 1.178 | 0.072 |
| Hippocampus | *Lepr*+/+ | 19 | 33.036 | 27.435 | 0.831 | 0.236 |
| *Lepr*+/+ | 20 | 32.972 | 26.870 | 0.587 | -0.102 |
| *Lepr*+/+ | 21 | 31.684 | 26.873 | 1.438 | -0.311 |
| *Lepr*+/+ | 22 | 32.048 | 26.906 | 1.143 |  |
| *Leprdb*/db | 25 | 32.910 | 27.050 | 0.695 | 0.021 |
| *Leprdb*/db | 28 | 32.048 | 26.872 | 1.116 | -0.199 |
| *Leprdb*/db | 26 | 31.885 | 26.467 | 0.944 | 0.188 |
| *Leprdb*/db | 27 | 31.147 | 26.860 | 2.067 | -0.112 |
| Cerebellum | *Lepr*+/+ | 20 | 34.266 | 27.556 | 0.321 | -0.080 |
| *Lepr*+/+ | 22 | 30.744 | 26.453 | 1.721 | -0.231 |
| *Lepr*+/+ | 21 | 32.150 | 26.737 | 0.790 | 0.158 |
| *Lepr*+/+ | 23 | 32.984 | 26.878 | 0.489 | 0.057 |
| *Leprdb*/db | 29 | 31.925 | 26.927 | 1.054 | -0.158 |
| *Leprdb*/db | 28 | 32.867 | 27.134 | 0.633 | 0.049 |
| *Leprdb*/db | 26 | 31.245 | 26.793 | 1.539 | -0.025 |
| *Leprdb*/db | 27 | 32.387 | 26.942 | 0.773 | 0.316 |
| Hypothalamus | *Lepr*+/+ | 19 | 32.355 | 27.045 | 0.595 | -0.225 |
| *Lepr*+/+ | 22 | 31.385 | 26.617 | 0.866 | -0.062 |
| *Lepr*+/+ | 21 | 30.888 | 26.643 | 1.245 | 0.093 |
| *Lepr*+/+ | 23 | 31.325 | 27.135 | 1.294 | 0.111 |
| *Leprdb*/db | 25 | 32.286 | 27.751 | 1.018 | 0.009 |
| *Leprdb*/db | 28 | 30.889 | 26.452 | 1.089 | 0.037 |
| *Leprdb*/db | 26 | 31.945 | 26.986 | 0.759 | -0.120 |
| *Leprdb*/db | 27 | 31.109 | 27.564 | 2.022 | 0.305 |
| AGPAT3 | Cortex | *Lepr*+/+ | 18 | 26.864 | 26.906 | 0.887 | -0.052 |
| *Lepr*+/+ | 19 | 26.804 | 26.835 | 0.881 | -0.055 |
| *Lepr*+/+ | 20 | 26.791 | 27.090 | 1.061 | 0.025 |
| *Lepr*+/+ | 21 | 26.628 | 27.069 | 1.170 | 0.068 |
| *Leprdb*/db | 24 | 27.219 | 27.808 | 1.297 | 0.114 |
| *Leprdb*/db | 25 | 26.647 | 26.850 | 0.993 | -0.003 |
| *Leprdb*/db | 26 | 27.009 | 27.138 | 0.943 | -0.025 |
| *Leprdb*/db | 27 | 26.984 | 27.075 | 0.918 | -0.037 |
| Hippocampus | *Lepr*+/+ | 19 | 27.173 | 27.368 | 1.099 | 0.041 |
| *Lepr*+/+ | 20 | 27.063 | 26.906 | 0.861 | -0.065 |
| *Lepr*+/+ | 21 | 26.478 | 26.632 | 1.069 | 0.029 |
| *Lepr*+/+ | 22 | 26.924 | 26.940 | 0.971 | -0.013 |
| *Leprdb*/db | 25 | 27.353 | 27.356 | 0.963 | -0.016 |
| *Leprdb*/db | 28 | 26.972 | 27.036 | 1.003 | 0.000 |
| *Leprdb*/db | 26 | 26.853 | 26.484 | 0.743 | -0.129 |
| *Leprdb*/db | 27 | 26.922 | 26.612 | 0.774 | -0.111 |
| Cerebellum | *Lepr*+/+ | 20 | 26.730 | 27.230 | 0.991 | -0.004 |
| *Lepr*+/+ | 22 | 26.323 | 26.795 | 0.972 | -0.012 |
| *Lepr*+/+ | 21 | 26.128 | 26.812 | 1.125 | 0.053 |
| *Lepr*+/+ | 23 | 26.670 | 27.050 | 0.912 | -0.040 |
| *Leprdb*/db | 29 | 26.561 | 27.370 | 1.226 | 0.090 |
| *Leprdb*/db | 28 | 26.525 | 27.452 | 1.332 | 0.124 |
| *Leprdb*/db | 26 | 26.259 | 26.741 | 0.979 | -0.009 |
| *Leprdb*/db | 27 | 26.237 | 26.800 | 1.035 | 0.013 |
| Hypothalamus | *Lepr*+/+ | 19 | 27.311 | 27.146 | 0.938 | -0.028 |
| *Lepr*+/+ | 22 | 26.777 | 26.952 | 1.188 | 0.076 |
| *Lepr*+/+ | 21 | 27.021 | 26.694 | 0.839 | -0.076 |
| *Lepr*+/+ | 23 | 27.182 | 27.158 | 1.035 | 0.013 |
| *Leprdb*/db | 25 | 27.528 | 27.934 | 1.394 | 0.143 |
| *Leprdb*/db | 28 | 26.897 | 26.972 | 1.108 | 0.045 |
| *Leprdb*/db | 26 | 27.001 | 27.173 | 1.186 | 0.076 |
| *Leprdb*/db | 27 | 26.917 | 27.404 | 1.474 | 0.167 |
| AGPAT4 | Cortex | *Lepr*+/+ | 18 | 28.309 | 26.494 | 0.761 | -0.119 |
| *Lepr*+/+ | 19 | 28.179 | 26.643 | 0.924 | -0.034 |
| *Lepr*+/+ | 20 | 28.368 | 27.110 | 1.119 | 0.049 |
| *Lepr*+/+ | 21 | 28.184 | 27.021 | 1.196 | 0.079 |
| *Leprdb*/db | 24 | 28.620 | 27.518 | 1.248 | 0.097 |
| *Leprdb*/db | 25 | 28.360 | 26.477 | 0.726 | -0.139 |
| *Leprdb*/db | 26 | 28.471 | 26.919 | 0.913 | -0.040 |
| *Leprdb*/db | 27 | 28.474 | 26.931 | 0.919 | -0.037 |
| Hippocampus | *Lepr*+/+ | 19 | 28.485 | 26.976 | 0.864 | -0.063 |
| *Lepr*+/+ | 20 | 28.069 | 26.770 | 0.999 | 0.000 |
| *Lepr*+/+ | 21 | 27.752 | 26.458 | 1.003 | 0.000 |
| *Lepr*+/+ | 22 | 27.978 | 26.862 | 1.134 | 0.053 |
| *Leprdb*/db | 25 | 28.625 | 26.953 | 0.772 | -0.112 |
| *Leprdb*/db | 28 | 28.254 | 26.967 | 1.008 | 0.004 |
| *Leprdb*/db | 26 | 28.011 | 26.460 | 0.839 | -0.076 |
| *Leprdb*/db | 27 | 28.151 | 26.614 | 0.848 | -0.072 |
| Cerebellum | *Lepr*+/+ | 20 | 28.805 | 26.977 | 1.108 | 0.045 |
| *Lepr*+/+ | 22 | 28.494 | 26.286 | 0.852 | -0.070 |
| *Lepr*+/+ | 21 | 28.639 | 26.848 | 1.137 | 0.057 |
| *Lepr*+/+ | 23 | 28.775 | 26.654 | 0.904 | -0.044 |
| *Leprdb*/db | 29 | 28.906 | 27.058 | 1.093 | 0.037 |
| *Leprdb*/db | 28 | 29.120 | 27.245 | 1.072 | 0.029 |
| *Leprdb*/db | 26 | 28.573 | 26.634 | 1.026 | 0.013 |
| *Leprdb*/db | 27 | 28.433 | 26.848 | 1.312 | 0.117 |
| Hypothalamus | *Lepr*+/+ | 19 | 28.364 | 27.030 | 0.949 | -0.023 |
| *Lepr*+/+ | 22 | 27.752 | 26.829 | 1.262 | 0.100 |
| *Lepr*+/+ | 21 | 28.116 | 26.475 | 0.767 | -0.115 |
| *Lepr*+/+ | 23 | 28.516 | 27.288 | 1.022 | 0.009 |
| *Leprdb*/db | 25 | 28.867 | 27.903 | 1.227 | 0.090 |
| *Leprdb*/db | 28 | 27.976 | 26.810 | 1.066 | 0.029 |
| *Leprdb*/db | 26 | 28.351 | 26.974 | 0.921 | -0.036 |
| *Leprdb*/db | 27 | 28.606 | 27.232 | 0.923 | -0.035 |
| LIPIN1 | Cortex | *Lepr*+/+ | 18 | 30.083 | 26.601 | 0.688 | -0.162 |
| *Lepr*+/+ | 19 | 29.953 | 26.685 | 0.799 | -0.097 |
| *Lepr*+/+ | 20 | 29.909 | 27.362 | 1.316 | 0.121 |
| *Lepr*+/+ | 21 | 29.567 | 26.882 | 1.196 | 0.079 |
| *Leprdb*/db | 24 | 30.235 | 27.527 | 1.178 | 0.072 |
| *Leprdb*/db | 25 | 29.015 | 26.891 | 1.764 | 0.246 |
| *Leprdb*/db | 26 | 30.264 | 27.147 | 0.886 | -0.053 |
| *Leprdb*/db | 27 | 29.775 | 26.585 | 0.843 | -0.074 |
| Hippocampus | *Lepr*+/+ | 19 | 29.971 | 27.004 | 0.869 | -0.061 |
| *Lepr*+/+ | 20 | 29.845 | 26.972 | 0.927 | -0.033 |
| *Lepr*+/+ | 21 | 29.485 | 26.738 | 1.012 | 0.004 |
| *Lepr*+/+ | 22 | 29.414 | 26.903 | 1.191 | 0.076 |
| *Leprdb*/db | 25 | 29.589 | 27.028 | 1.152 | 0.061 |
| *Leprdb*/db | 28 | 29.829 | 26.916 | 0.902 | -0.045 |
| *Leprdb*/db | 26 | 29.304 | 26.407 | 0.912 | -0.040 |
| *Leprdb*/db | 27 | 29.338 | 26.567 | 0.995 | -0.002 |
| Cerebellum | *Lepr*+/+ | 20 | 29.073 | 26.852 | 0.912 | -0.040 |
| *Lepr*+/+ | 22 | 28.794 | 26.504 | 0.869 | -0.061 |
| *Lepr*+/+ | 21 | 28.718 | 26.897 | 1.203 | 0.079 |
| *Lepr*+/+ | 23 | 28.976 | 26.913 | 1.017 | 0.009 |
| *Leprdb*/db | 29 | 28.520 | 26.937 | 1.419 | 0.152 |
| *Leprdb*/db | 28 | 29.026 | 27.198 | 1.197 | 0.079 |
| *Leprdb*/db | 26 | 28.370 | 26.654 | 1.294 | 0.111 |
| *Leprdb*/db | 27 | 28.482 | 27.042 | 1.566 | 0.196 |
| Hypothalamus | *Lepr*+/+ | 19 | 28.863 | 27.151 | 0.994 | -0.003 |
| *Lepr*+/+ | 22 | 28.425 | 26.678 | 0.970 | -0.013 |
| *Lepr*+/+ | 21 | 28.515 | 26.613 | 0.871 | -0.060 |
| *Lepr*+/+ | 23 | 28.883 | 27.401 | 1.166 | 0.068 |
| *Leprdb*/db | 25 | 28.830 | 27.752 | 1.542 | 0.188 |
| *Leprdb*/db | 28 | 28.495 | 26.750 | 0.971 | -0.013 |
| *Leprdb*/db | 26 | 28.744 | 26.910 | 0.913 | -0.040 |
| *Leprdb*/db | 27 | 28.995 | 27.318 | 1.018 | 0.009 |
| LIPIN2 | Cortex | *Lepr*+/+ | 18 | 28.589 | 26.486 | 0.838 | -0.077 |
| *Lepr*+/+ | 19 | 28.433 | 26.574 | 0.993 | -0.003 |
| *Lepr*+/+ | 20 | 28.598 | 26.991 | 1.182 | 0.072 |
| *Lepr*+/+ | 21 | 28.596 | 26.728 | 0.987 | -0.006 |
| *Leprdb*/db | 24 | 28.656 | 27.674 | 1.822 | 0.260 |
| *Leprdb*/db | 25 | 28.856 | 26.618 | 0.763 | -0.117 |
| *Leprdb*/db | 26 | 29.151 | 27.243 | 0.959 | -0.018 |
| *Leprdb*/db | 27 | 28.573 | 26.724 | 1.000 | 0.000 |
| Hippocampus | *Lepr*+/+ | 19 | 28.952 | 27.435 | 1.106 | 0.045 |
| *Lepr*+/+ | 20 | 28.466 | 26.870 | 1.047 | 0.021 |
| *Lepr*+/+ | 21 | 28.776 | 26.873 | 0.847 | -0.072 |
| *Lepr*+/+ | 22 | 28.925 | 26.940 | 0.800 | -0.097 |
| *Leprdb*/db | 25 | 28.786 | 27.050 | 0.950 | -0.022 |
| *Leprdb*/db | 28 | 28.364 | 26.872 | 1.125 | 0.053 |
| *Leprdb*/db | 26 | 28.266 | 26.467 | 0.909 | -0.041 |
| *Leprdb*/db | 27 | 29.280 | 26.860 | 0.591 | -0.228 |
| Cerebellum | *Lepr*+/+ | 20 | 28.976 | 27.556 | 1.303 | 0.114 |
| *Lepr*+/+ | 22 | 28.441 | 26.737 | 1.071 | 0.029 |
| *Lepr*+/+ | 21 | 28.962 | 26.340 | 1.071 | 0.029 |
| *Lepr*+/+ | 23 | 29.629 | 26.980 | 0.556 | -0.255 |
| *Leprdb*/db | 29 | 28.792 | 26.927 | 0.807 | -0.093 |
| *Leprdb*/db | 28 | 28.728 | 27.134 | 0.973 | -0.012 |
| *Leprdb*/db | 26 | 28.254 | 26.793 | 1.070 | 0.029 |
| *Leprdb*/db | 27 | 28.791 | 26.942 | 0.815 | -0.089 |
| Hypothalamus | *Lepr*+/+ | 19 | 28.686 | 27.045 | 0.901 | -0.045 |
| *Lepr*+/+ | 22 | 27.933 | 26.617 | 1.129 | 0.053 |
| *Lepr*+/+ | 21 | 28.162 | 26.643 | 0.980 | -0.009 |
| *Lepr*+/+ | 23 | 28.640 | 27.135 | 0.990 | -0.004 |
| *Leprdb*/db | 25 | 28.763 | 27.751 | 1.393 | 0.143 |
| *Leprdb*/db | 28 | 27.945 | 26.452 | 0.997 | -0.001 |
| *Leprdb*/db | 26 | 28.636 | 26.986 | 0.895 | -0.048 |
| *Leprdb*/db | 27 | 28.483 | 27.564 | 1.486 | 0.173 |
| DGAT1 | Cortex | *Lepr*+/+ | 18 | 30.926 | 26.715 | 1.246 | 0.097 |
| *Lepr*+/+ | 19 | 30.777 | 26.824 | 1.491 | 0.173 |
| *Lepr*+/+ | 20 | 32.410 | 27.197 | 0.622 | -0.206 |
| *Lepr*+/+ | 21 | 31.896 | 26.728 | 0.642 | -0.192 |
| *Leprdb*/db | 24 | 32.067 | 27.470 | 0.953 | -0.021 |
| *Leprdb*/db | 25 | 31.020 | 26.484 | 0.995 | -0.002 |
| *Leprdb*/db | 26 | 31.974 | 26.811 | 0.644 | -0.191 |
| *Leprdb*/db | 27 | 31.794 | 26.724 | 0.687 | -0.163 |
| Hippocampus | *Lepr*+/+ | 19 | 31.342 | 27.121 | 1.485 | 0.170 |
| *Lepr*+/+ | 20 | 31.514 | 26.693 | 0.979 | -0.009 |
| *Lepr*+/+ | 21 | 31.900 | 26.571 | 0.689 | -0.162 |
| *Lepr*+/+ | 22 | 31.820 | 26.790 | 0.848 | -0.072 |
| *Leprdb*/db | 25 | 31.679 | 26.914 | 1.018 | 0.009 |
| *Leprdb*/db | 28 | 31.794 | 26.741 | 0.834 | -0.079 |
| *Leprdb*/db | 26 | 31.136 | 26.545 | 1.149 | 0.061 |
| *Leprdb*/db | 27 | 31.478 | 26.653 | 0.977 | -0.010 |
| Cerebellum | *Lepr*+/+ | 20 | 30.881 | 26.953 | 0.973 | -0.012 |
| *Lepr*+/+ | 22 | 30.599 | 26.343 | 0.775 | -0.111 |
| *Lepr*+/+ | 21 | 31.130 | 26.921 | 0.801 | -0.096 |
| *Lepr*+/+ | 23 | 30.315 | 26.963 | 1.450 | 0.161 |
| *Leprdb*/db | 29 | 30.928 | 27.024 | 0.990 | -0.004 |
| *Leprdb*/db | 28 | 31.033 | 27.124 | 0.987 | -0.006 |
| *Leprdb*/db | 26 | 31.253 | 26.645 | 0.608 | -0.216 |
| *Leprdb*/db | 27 | 31.312 | 26.915 | 0.703 | -0.153 |
| Hypothalamus | *Lepr*+/+ | 19 | 30.858 | 27.096 | 1.091 | 0.037 |
| *Lepr*+/+ | 22 | 31.080 | 26.711 | 0.717 | -0.144 |
| *Lepr*+/+ | 21 | 30.315 | 27.078 | 1.570 | 0.196 |
| *Lepr*+/+ | 23 | 32.307 | 27.736 | 0.623 | -0.206 |
| *Leprdb*/db | 25 | 32.052 | 27.632 | 0.691 | -0.161 |
| *Leprdb*/db | 28 | 30.139 | 26.270 | 1.013 | 0.004 |
| *Leprdb*/db | 26 | 31.068 | 27.040 | 0.907 | -0.042 |
| *Leprdb*/db | 27 | 31.930 | 27.511 | 0.692 | -0.160 |
| DGAT2 | Cortex | *Lepr*+/+ | 18 | 28.024 | 26.715 | 1.038 | 0.017 |
| *Lepr*+/+ | 19 | 28.063 | 26.824 | 1.090 | 0.037 |
| *Lepr*+/+ | 20 | 28.401 | 27.197 | 1.117 | 0.049 |
| *Lepr*+/+ | 21 | 28.496 | 26.728 | 0.755 | -0.122 |
| *Leprdb*/db | 24 | 28.231 | 27.470 | 1.518 | 0.182 |
| *Leprdb*/db | 25 | 27.371 | 26.484 | 1.391 | 0.143 |
| *Leprdb*/db | 26 | 28.002 | 26.811 | 1.127 | 0.053 |
| *Leprdb*/db | 27 | 28.271 | 26.724 | 0.881 | -0.055 |
| Hippocampus | *Lepr*+/+ | 19 | 28.029 | 27.121 | 1.006 | 0.004 |
| *Lepr*+/+ | 20 | 27.685 | 26.693 | 0.948 | -0.023 |
| *Lepr*+/+ | 21 | 27.498 | 26.571 | 0.992 | -0.003 |
| *Lepr*+/+ | 22 | 27.630 | 26.790 | 1.054 | 0.021 |
| *Leprdb*/db | 25 | 27.691 | 26.914 | 1.100 | 0.041 |
| *Leprdb*/db | 28 | 27.341 | 26.741 | 1.245 | 0.093 |
| *Leprdb*/db | 26 | 27.434 | 26.545 | 1.018 | 0.009 |
| *Leprdb*/db | 27 | 27.613 | 26.653 | 0.970 | -0.013 |
| Cerebellum | *Lepr*+/+ | 20 | 30.067 | 26.953 | 1.116 | 0.049 |
| *Lepr*+/+ | 22 | 30.024 | 26.343 | 0.753 | -0.123 |
| *Lepr*+/+ | 21 | 29.977 | 26.921 | 1.161 | 0.064 |
| *Lepr*+/+ | 23 | 30.280 | 26.963 | 0.970 | -0.013 |
| *Leprdb*/db | 29 | 29.343 | 27.024 | 1.936 | 0.288 |
| *Leprdb*/db | 28 | 29.860 | 27.124 | 1.451 | 0.161 |
| *Leprdb*/db | 26 | 29.933 | 26.645 | 0.989 | -0.005 |
| *Leprdb*/db | 27 | 29.899 | 26.915 | 1.221 | 0.086 |
| Hypothalamus | *Lepr*+/+ | 19 | 29.167 | 27.096 | 0.946 | -0.024 |
| *Lepr*+/+ | 22 | 28.825 | 26.711 | 0.919 | -0.037 |
| *Lepr*+/+ | 21 | 29.196 | 27.078 | 0.916 | -0.038 |
| *Lepr*+/+ | 23 | 29.442 | 27.736 | 1.219 | 0.086 |
| *Leprdb*/db | 25 | 29.260 | 27.632 | 1.287 | 0.111 |
| *Leprdb*/db | 28 | 28.602 | 26.270 | 0.790 | -0.102 |
| *Leprdb*/db | 26 | 29.302 | 27.040 | 0.829 | -0.081 |
| *Leprdb*/db | 27 | 29.644 | 27.511 | 0.907 | -0.042 |
| MOGAT1 | Cortex | *Lepr*+/+ | 18 | undetermined | 26.637 | N/A | N/A |
| *Lepr*+/+ | 19 | undetermined | 26.755 | N/A | N/A |
| *Lepr*+/+ | 20 | undetermined | 27.142 | N/A | N/A |
| *Lepr*+/+ | 21 | undetermined | 27.073 | N/A | N/A |
| *Leprdb*/db | 24 | undetermined | 27.444 | N/A | N/A |
| *Leprdb*/db | 25 | undetermined | 26.618 | N/A | N/A |
| *Leprdb*/db | 26 | undetermined | 27.276 | N/A | N/A |
| *Leprdb*/db | 27 | undetermined | 27.150 | N/A | N/A |
| Hippocampus | *Lepr*+/+ | 19 | 30.385 | 26.911 | 1.242 | 0.093 |
| *Lepr*+/+ | 20 | 29.868 | 26.773 | 1.614 | 0.207 |
| *Lepr*+/+ | 21 | 30.811 | 26.722 | 0.811 | -0.091 |
| *Lepr*+/+ | 22 | 32.311 | 26.940 | 0.333 | -0.478 |
| *Leprdb*/db | 25 | 32.910 | 26.911 | 0.216 | -0.666 |
| *Leprdb*/db | 26 | 30.709 | 26.271 | 0.636 | -0.197 |
| *Leprdb*/db | 27 | 34.836 | 26.766 | 0.051 | -1.289 |
| Cerebellum | *Lepr*+/+ | 20 | 30.443 | 26.015 | 0.694 | -0.159 |
| *Lepr*+/+ | 22 | 29.175 | 25.945 | 1.592 | 0.201 |
| *Lepr*+/+ | 21 | 29.356 | 26.147 | 1.615 | 0.207 |
| *Lepr*+/+ | 23 | 33.445 | 26.216 | 0.100 | -1.002 |
| *Leprdb*/db | 29 | 31.361 | 26.449 | 0.496 | -0.305 |
| *Leprdb*/db | 28 | 30.387 | 26.477 | 0.994 | -0.003 |
| *Leprdb*/db | 26 | 29.886 | 26.166 | 1.133 | 0.053 |
| *Leprdb*/db | 27 | 29.554 | 26.408 | 1.687 | 0.228 |
| Hypothalamus | *Lepr*+/+ | 19 | 28.469 | 26.955 | 0.618 | -0.209 |
| *Lepr*+/+ | 22 | 27.267 | 26.682 | 1.176 | 0.072 |
| *Lepr*+/+ | 21 | 27.776 | 26.749 | 0.866 | -0.062 |
| *Lepr*+/+ | 23 | 28.283 | 27.887 | 1.340 | 0.127 |
| *Leprdb*/db | 25 | 28.605 | 27.320 | 0.724 | -0.140 |
| *Leprdb*/db | 28 | 27.460 | 26.318 | 0.800 | -0.097 |
| *Leprdb*/db | 26 | 28.728 | 27.281 | 0.647 | -0.189 |
| *Leprdb*/db | 27 | 28.054 | 27.911 | 1.597 | 0.204 |

The table shows the raw data of Figure 3 of the main manuscript. In the “mouse number” column, each number indicates a different mouse. Ct refers to the cycle threshold obtained in the qPCR experiments. 2-ΔΔCT refers to the 2-ΔΔCT method (2-(ΔCT test samples – ΔCT calibrator samples)). N/A: not applicable

# Table S4: Values of Cycle threshold (Ct) of reference genes obtained from qPCR experiments.

| Gene | Brain region | Mouse number | Ct |
| --- | --- | --- | --- |
|
| PPIB (cyclophilin) | Cortex | 1 | 26.814 |
| 2 | 25.579 |
| 3 | 25.681 |
| 4 | 25.811 |
| Hippocampus | 10 | 25.940 |
| 5 | 25.953 |
| 6 | 25.464 |
| 7 | 25.427 |
| Cerebellum | 4 | 25.723 |
| 8 | 25.279 |
| 9 | 25.580 |
| 6 | 25.591 |
| Hypothalamus | 10 | 26.242 |
| 4 | 25.307 |
| 9 | 25.678 |
| 11 | 25.894 |
| HPRT1 (hypoxanthine guanine) | Cortex | 1 | 24.606 |
| 2 | 25.242 |
| 3 | 25.119 |
| 4 | 24.348 |
| Hippocampus | 10 | 26.719 |
| 5 | 24.283 |
| 6 | 24.087 |
| 7 | 25.078 |
| Cerebellum | 4 | 25.946 |
| 8 | 24.946 |
| 9 | 25.884 |
| 6 | 24.986 |
| Hypothalamus | 10 | 27.052 |
| 4 | 27.668 |
| 9 | 27.435 |
| 11 | 26.637 |
| GAPDH (glyceraldehyde-3-phosphate) | Cortex | 1 | 20.807 |
| 2 | 19.696 |
| 3 | 20.134 |
| 4 | 20.264 |
| Hippocampus | 10 | 19.793 |
| 5 | 19.745 |
| 6 | 19.625 |
| 7 | 19.780 |
| Cerebellum | 4 | 20.166 |
| 8 | 19.400 |
| 9 | 20.112 |
| 6 | 19.948 |

The table shows the Ct values of three different reference genes, measured across brain regions (cortex, hippocampus, cerebellum and hypothalamus) of the wild type mice. In the “mouse number” column, each number indicates a different mouse. All of the mice of this table are wild type mice from the background of the *Agpat2* mice (*Agpat2*+/+). Ct refers to the cycle threshold obtained in the qPCR experiments.

# Table S5: Summary of the changes in mRNA levels of the enzymes involved in glycerolipids synthesis in *Agpat2-/-* and *Leprdb/db* mice.

|  | ***Agpat2*-/-** | | ***Lepr*db/db** | |
| --- | --- | --- | --- | --- |
| **Gene** | **Change** | **Brain regions** | **Change** | **Brain regions** |
| **GPAT1** | ↓ | hypothalamus | ↑ | cerebellum |
| **AGPAT1** | unchanged | cortex, hypothalamus, hippocampus, cerebellum | unchanged | cortex, hypothalamus, hippocampus, cerebellum |
|
| **AGPAT2** | Not expressed in *Agpat2*-/- mice | cortex, hypothalamus, hippocampus, cerebellum | unchanged | cortex, hypothalamus, hippocampus, cerebellum |
|
| **AGPAT3** | ↓ | hippocampus, hypothalamus | ↑ | hypothalamus |
| **AGPAT4** | ↓ | hypothalamus | unchanged | cortex, hypothalamus, hippocampus, cerebellum |
|
|
| **LIPIN1** | ↑ | cortex, hypothalamus, hippocampus, cerebellum | ↑ | cerebellum |
| **LIPIN2** | unchanged | cortex, hypothalamus, hippocampus, cerebellum | unchanged | cortex, hypothalamus, hippocampus, cerebellum |
|
| **DGAT1** | unchanged | cortex, hypothalamus, hippocampus, cerebellum | unchanged | cortex, hypothalamus, |
| hippocampus, cerebellum |
| **DGAT2** | unchanged | cortex, hypothalamus, hippocampus, cerebellum | unchanged | cortex, hypothalamus, hippocampus, cerebellum |
|
| **MOGAT1** | ↓ | cortex, hypothalamus, cerebellum | unchanged | hypothalamus, hippocampus, cerebellum, not expressed in cortex |
|

The table shows the changes in mRNA expression in comparison to wild type mice.↑ indicates a significant increase in the mRNA expression levels with respect to wild type littermates.↓ indicates a significant decrease in the mRNA expression levels with respect to wild type littermates.

# Table S6: Diagram of the PCR plates used to generate the data of the manuscript.

| PLATE1 | 1 | 2 | 3 | 4 | 5 | 6 | 7 | 8 | 9 | 10 | 11 | 12 |
| --- | --- | --- | --- | --- | --- | --- | --- | --- | --- | --- | --- | --- |
| A | Cortex 1 Cyclo | Cer 4 Cyclo | Cortex 1 GPAT1 | Cortex 1 LIPIN3 | Hippoc 10 GPAT1 | Hippoc 10 LIPIN3 | Cer 4 GPAT1 | Cer 4 LIPIN3 | Hypo 10 GPAT1 | Hypo 10 LIPIN3 | Hypo 10 AGPAT2 |  |
| B | Cortex 2 Cyclo | Cer 8 Cyclo | Cortex 1 GPAT1 | Cortex 1 LIPIN3 | Hippoc 10 GPAT1 | Hippoc 10 LIPIN3 | Cer 4 GPAT1 | Cer 4 LIPIN3 | Hypo 10 GPAT1 | Hypo 10 LIPIN3 | Hypo 10 AGPAT2 |  |
| C | Cortex 3 Cyclo | Cer 9 Cyclo | Cortex 2 GPAT1 | Cortex 2 LIPIN3 | Hippoc 5 GPAT1 | Hippoc 5 LIPIN3 | Cer 8 GPAT1 | Cer 8 LIPIN3 | Hypo 4 GPAT1 | Hypo 4 LIPIN3 | Hypo 4 AGPAT2 |  |
| D | Cortex 4 Cyclo | Cer 6 Cyclo | Cortex 2 GPAT1 | Cortex 2 LIPIN3 | Hippoc 5 GPAT1 | Hippoc 5 LIPIN3 | Cer 8 GPAT1 | Cer 8 LIPIN3 | Hypo 4 GPAT1 | Hypo 4 LIPIN3 | Hypo 4 AGPAT2 |  |
| E | Hippoc 10 Cyclo | Hypo 10 Cyclo | Cortex 3 GPAT1 | Cortex 3 LIPIN3 | Hippoc 6 GPAT1 | Hippoc 6 LIPIN3 | Cer 9 GPAT1 | Cer 9 LIPIN3 | Hypo 9 GPAT1 | Hypo 9 LIPIN3 | Hypo 9 AGPAT2 |  |
| F | Hippoc 5 Cyclo | Hypo 4 Cyclo | Cortex 3 GPAT1 | Cortex 3 LIPIN3 | Hippoc 6 GPAT1 | Hippoc 6 LIPIN3 | Cer 9 GPAT1 | Cer 9 LIPIN3 | Hypo 9 GPAT1 | Hypo 9 LIPIN3 | Hypo 9 AGPAT2 |  |
| G | Hippoc 6 Cyclo | Hypo 9 Cyclo | Cortex 4 GPAT1 | Cortex 4 LIPIN3 | Hippoc 7 GPAT1 | Hippoc 7 LIPIN3 | Cer 6 GPAT1 | Cer 6 LIPIN3 | Hypo 11 GPAT1 | Hypo 11 LIPIN3 | Hypo 11 AGPAT2 | NTC |
| H | Hippoc 7 Cyclo | Hypo 11 Cyclo | Cortex 4 GPAT1 | Cortex 4 LIPIN3 | Hippoc 7 GPAT1 | Hippoc 7 LIPIN3 | Cer 6 GPAT1 | Cer 6 LIPIN3 | Hypo 11 GPAT1 | Hypo 11 LIPIN3 | Hypo 11 AGPAT2 | NTC |
|  |  |  |  |  |  |  |  |  |  |  |  |  |
| PLATE2 | 1 | 2 | 3 | 4 | 5 | 6 | 7 | 8 | 9 | 10 | 11 | 12 |
| A | Cortex 1 Cyclo | Cortex 1 GPAT2 | Cortex 1 MOGAT1 | Hippoc 10 GPAT2 | Hippoc 10 MOGAT1 | Cortex 12 Cyclo | Cortex 12 MOGAT1 | Hippoc 12 MOGAT1 | Hippoc 1 Cyclo |  |  | Cortex 1 MOGAT2 |
| B | Cortex 2 Cyclo | Cortex 1 GPAT2 | Cortex 1 MOGAT1 | Hippoc 10 GPAT2 | Hippoc 10 MOGAT1 | Cortex 13 Cyclo | Cortex 12 MOGAT1 | Hippoc 12 MOGAT1 | Hippoc 1 Cyclo |  |  | Cortex 1 MOGAT2 |
| C | Cortex 3 Cyclo | Cortex 2 GPAT2 | Cortex 2 MOGAT1 | Hippoc 5 GPAT2 | Hippoc 5 MOGAT1 | Cortex 14 Cyclo | Cortex 13 MOGAT1 | Hippoc 13 MOGAT1 | NTC |  |  | Cortex 2 MOGAT2 |
| D | Cortex 4 Cyclo | Cortex 2 GPAT2 | Cortex 2 MOGAT1 | Hippoc 5 GPAT2 | Hippoc 5 MOGAT1 | Cortex 15 Cyclo | Cortex 13 MOGAT1 | Hippoc 13 MOGAT1 | NTC |  |  | Cortex 2 MOGAT2 |
| E | Hippoc 10 Cyclo | Cortex 3 GPAT2 | Cortex 3 MOGAT1 | Hippoc 6 GPAT2 | Hippoc 6 MOGAT1 | Hippoc 12 Cyclo | Cortex 14 MOGAT1 | Hippoc 14 MOGAT1 |  |  |  | Cortex 3 MOGAT2 |
| F | Hippoc 5 Cyclo | Cortex 3 GPAT2 | Cortex 3 MOGAT1 | Hippoc 6 GPAT2 | Hippoc 6 MOGAT1 | Hippoc 13 Cyclo | Cortex 14 MOGAT1 | Hippoc 14 MOGAT1 |  |  |  | Cortex 3 MOGAT2 |
| G | Hippoc 6 Cyclo | Cortex 4 GPAT2 | Cortex 4 MOGAT1 | Hippoc 7 GPAT2 | Hippoc 7 MOGAT1 | Hippoc 14 Cyclo | Cortex 15 MOGAT1 | Hippoc 15 MOGAT1 |  |  |  | Cortex 4 MOGAT2 |
| H | Hippoc 7 Cyclo | Cortex 4 GPAT2 | Cortex 4 MOGAT1 | Hippoc 7 GPAT2 | Hippoc 7 MOGAT1 | Hippoc 15 Cyclo | Cortex 15 MOGAT1 | Hippoc 15 MOGAT1 |  |  |  | Cortex 4 MOGAT2 |
|  |  |  |  |  |  |  |  |  |  |  |  |  |
| PLATE 3 | 1 | 2 | 3 | 4 | 5 | 6 | 7 | 8 | 9 | 10 | 11 | 12 |
| A | Cer 4 Cyclo | Cer 4 GPAT2 | Cer 4 MOGAT1 | Cer 4 MOGAT2 | Cer4 AGPAT2 | Cer 12 Cyclo | Cer 12 MOGAT1 | Hypo 10 GPAT2 | Hippoc 10 Cyclo | Hippoc 10 AGPAT2 | Hippoc 10 MOGAT2 |  |
| B | Cer 8 Cyclo | Cer 4 GPAT2 | Cer 4 MOGAT1 | Cer 4 MOGAT2 | Cer4 AGPAT2 | Cer 13 Cyclo | Cer 12 MOGAT1 | Hypo 10 GPAT2 | Hippoc 5 Cyclo | Hippoc 10 AGPAT2 | Hippoc 10 MOGAT2 |  |
| C | Cer 9 Cyclo | Cer 8 GPAT2 | Cer 8 MOGAT1 | Cer 8 MOGAT2 | Cer8 AGPAT2 | Cer 14 Cyclo | Cer 13 MOGAT1 | Hypo 4 GPAT2 | Hippoc 6 Cyclo | Hippoc 5 AGPAT2 | Hippoc 5 MOGAT2 |  |
| D | Cer 6 Cyclo | Cer 8 GPAT2 | Cer 8 MOGAT1 | Cer 8 MOGAT2 | Cer8 AGPAT2 | Cer 15 Cyclo | Cer 13 MOGAT1 | Hypo 4 GPAT2 | Hippoc 7 Cyclo | Hippoc 5 AGPAT2 | Hippoc 5 MOGAT2 |  |
| E | Hypo 10 Cyclo | Cer 9 GPAT2 | Cer 9 MOGAT1 | Cer 9 MOGAT2 | Cer9 AGPAT2 | Cer 12 Cyclo | Cer 14 MOGAT1 | Hypo 9 GPAT2 | NTC | Hippoc 6 AGPAT2 | Hippoc 6 MOGAT2 |  |
| F | Hypo 4 Cyclo | Cer 9 GPAT2 | Cer 9 MOGAT1 | Cer 9 MOGAT2 | Cer9 AGPAT2 | Cer 13 Cyclo | Cer 14 MOGAT1 | Hypo 9 GPAT2 | NTC | Hippoc 6 AGPAT2 | Hippoc 6 MOGAT2 |  |
| G | Hypo 9 Cyclo | Cer 6 GPAT2 | Cer 6 MOGAT1 | Cer 6 MOGAT2 | Cer6 AGPAT2 | Cer 14 Cyclo | Cer 15 MOGAT1 | Hypo 11 GPAT2 |  | Hippoc 7 AGPAT2 | Hippoc 7 MOGAT2 |  |
| H | Hypo 11 Cyclo | Cer 6 GPAT2 | Cer 6 MOGAT1 | Cer 6 MOGAT2 | Cer6 AGPAT2 | Cer 15 Cyclo | Cer 15 MOGAT1 | Hypo 11 GPAT2 |  | Hippoc 7 AGPAT2 | Hippoc 7 MOGAT2 |  |
|  |  |  |  |  |  |  |  |  |  |  |  |  |
| PLATE 4 | 1 | 2 | 3 | 4 | 5 | 6 | 7 | 8 | 9 | 10 | 11 | 12 |
| A | Cortex 1 Cyclo | Cortex 12 Cyclo | Cortex 1 AGPAT1 | Cortex 1 LIPIN1 | Cortex 1 DGAT1 | Cortex 1 DGAT2 | Cortex 12 DGAT1 | Cortex 1 AGPAT2 | NTC |  |  |  |
| B | Cortex 2 Cyclo | Cortex 13 Cyclo | Cortex 1 AGPAT1 | Cortex 1 LIPIN1 | Cortex 1 DGAT1 | Cortex 1 DGAT2 | Cortex 12 DGAT1 | Cortex 1 AGPAT2 | NTC |  |  |  |
| C | Cortex 3 Cyclo | Cortex 14 Cyclo | Cortex 2 AGPAT1 | Cortex 2 LIPIN1 | Cortex 2 DGAT1 | Cortex 2 DGAT2 | Cortex 13 DGAT1 | Cortex 2 AGPAT2 |  |  |  |  |
| D | Cortex 4 Cyclo | Cortex 15 Cyclo | Cortex 2 AGPAT1 | Cortex 2 LIPIN1 | Cortex 2 DGAT1 | Cortex 2 DGAT2 | Cortex 13 DGAT1 | Cortex 2 AGPAT2 |  |  |  |  |
| E | Cortex 1 Cyclo | Cortex 12 Cyclo | Cortex 3 AGPAT1 | Cortex 3 LIPIN1 | Cortex 3 DGAT1 | Cortex 3 DGAT2 | Cortex 14 DGAT1 | Cortex 3 AGPAT2 |  |  |  |  |
| F | Cortex 2 Cyclo | Cortex 13 Cyclo | Cortex 3 AGPAT1 | Cortex 3 LIPIN1 | Cortex 3 DGAT1 | Cortex 3 DGAT2 | Cortex 14 DGAT1 | Cortex 3 AGPAT2 |  |  |  |  |
| G | Cortex 3 Cyclo | Cortex 14 Cyclo | Cortex 4 AGPAT1 | Cortex 4 LIPIN1 | Cortex 4 DGAT1 | Cortex 4 DGAT2 | Cortex 15 DGAT1 | Cortex 4 AGPAT2 |  |  |  |  |
| H | Cortex 4 Cyclo | Cortex 15 Cyclo | Cortex 4 AGPAT1 | Cortex 4 LIPIN1 | Cortex 4 DGAT1 | Cortex 4 DGAT2 | Cortex 15 DGAT1 | Cortex 4 AGPAT2 |  |  |  |  |
|  |  |  |  |  |  |  |  |  |  |  |  |  |
| PLATE 5 | 1 | 2 | 3 | 4 | 5 | 6 | 7 | 8 | 9 | 10 | 11 | 12 |
| A | Hippoc 10 Cyclo | Hippoc 12 Cyclo | Hippoc 10 AGPAT1 | Hippoc 10 LIPIN1 | Hippoc 10 DGAT1 | Hippoc 10 DGAT2 | Hippoc 12 DGAT1 | Hippoc 1 Cyclo |  |  |  |  |
| B | Hippoc 5 Cyclo | Hippoc 13 Cyclo | Hippoc 10 AGPAT1 | Hippoc 10 LIPIN1 | Hippoc 10 DGAT1 | Hippoc 10 DGAT2 | Hippoc 12 DGAT1 | Hippoc 1 Cyclo |  |  |  |  |
| C | Hippoc 6 Cyclo | Hippoc 14 Cyclo | Hippoc 5 AGPAT1 | Hippoc 5 LIPIN1 | Hippoc 5 DGAT1 | Hippoc 5 DGAT2 | Hippoc 13 DGAT1 | NTC |  |  |  |  |
| D | Hippoc 7 Cyclo | Hippoc 15 Cyclo | Hippoc 5 AGPAT1 | Hippoc 5 LIPIN1 | Hippoc 5 DGAT1 | Hippoc 5 DGAT2 | Hippoc 13 DGAT1 | NTC |  |  |  |  |
| E | Hippoc 10 Cyclo | Hippoc 12 Cyclo | Hippoc 6 AGPAT1 | Hippoc 6 LIPIN1 | Hippoc 6 DGAT1 | Hippoc 6 DGAT2 | Hippoc 14 DGAT1 |  |  |  |  |  |
| F | Hippoc 5 Cyclo | Hippoc 13 Cyclo | Hippoc 6 AGPAT1 | Hippoc 6 LIPIN1 | Hippoc 6 DGAT1 | Hippoc 6 DGAT2 | Hippoc 14 DGAT1 |  |  |  |  |  |
| G | Hippoc 6 Cyclo | Hippoc 14 Cyclo | Hippoc 7 AGPAT1 | Hippoc 7 LIPIN1 | Hippoc 7 DGAT1 | Hippoc 7 DGAT2 | Hippoc 15 DGAT1 |  |  |  |  |  |
| H | Hippoc 7 Cyclo | Hippoc 15 Cyclo | Hippoc 7 AGPAT1 | Hippoc 7 LIPIN1 | Hippoc 7 DGAT1 | Hippoc 7 DGAT2 | Hippoc 15 DGAT1 |  |  |  |  |  |
|  |  |  |  |  |  |  |  |  |  |  |  |  |
| PLATE 6 | 1 | 2 | 3 | 4 | 5 | 6 | 7 | 8 | 9 | 10 | 11 | 12 |
| A | Cer 4 Cyclo | Cer 12 Cyclo | Cer4 AGPAT1 | Cer 4 LIPIN1 | Cer 4 DGAT1 | Cer 4 DGAT2 | Cer 12 DGAT1 | NTC |  |  |  |  |
| B | Cer 8 Cyclo | Cer 13 Cyclo | Cer4 AGPAT1 | Cer 4 LIPIN1 | Cer 4 DGAT1 | Cer 4 DGAT2 | Cer 12 DGAT1 | NTC |  |  |  |  |
| C | Cer 9 Cyclo | Cer 14 Cyclo | Cer8 AGPAT1 | Cer 8 LIPIN1 | Cer 8 DGAT1 | Cer 8 DGAT2 | Cer 13 DGAT1 |  |  |  |  |  |
| D | Cer 6 Cyclo | Cer 15 Cyclo | Cer8 AGPAT1 | Cer 8 LIPIN1 | Cer 8 DGAT1 | Cer 8 DGAT2 | Cer 13 DGAT1 |  |  |  |  |  |
| E | Cer 4 Cyclo | Cer 12 Cyclo | Cer9 AGPAT1 | Cer 9 LIPIN1 | Cer 9 DGAT1 | Cer 9 DGAT2 | Cer 14 DGAT1 |  |  |  |  |  |
| F | Cer 8 Cyclo | Cer 13 Cyclo | Cer9 AGPAT1 | Cer 9 LIPIN1 | Cer 9 DGAT1 | Cer 9 DGAT2 | Cer 14 DGAT1 |  |  |  |  |  |
| G | Cer 9 Cyclo | Cer 14 Cyclo | Cer6 AGPAT1 | Cer 6 LIPIN1 | Cer 6 DGAT1 | Cer 6 DGAT2 | Cer 15 DGAT1 |  |  |  |  |  |
| H | Cer 6 Cyclo | Cer 15 Cyclo | Cer6 AGPAT1 | Cer 6 LIPIN1 | Cer 6 DGAT1 | Cer 6 DGAT2 | Cer 15 DGAT1 |  |  |  |  |  |
|  |  |  |  |  |  |  |  |  |  |  |  |  |
| PLATE 7 | 1 | 2 | 3 | 4 | 5 | 6 | 7 | 8 | 9 | 10 | 11 | 12 |
| A | Hypo 10 Cyclo | Hypo 13 Cyclo | Hypo 10 AGPAT1 | Hypo 10 LIPIN1 | Hypo 10 DGAT1 | Hypo 10 DGAT2 | Hypo 13 DGAT1 | NTC |  |  |  |  |
| B | Hypo 4 Cyclo | Hypo 15 Cyclo | Hypo 10 AGPAT1 | Hypo 10 LIPIN1 | Hypo 10 DGAT1 | Hypo 10 DGAT2 | Hypo 13 DGAT1 | NTC |  |  |  |  |
| C | Hypo 9 Cyclo | Hypo 16 Cyclo | Hypo 4 AGPAT1 | Hypo 4 LIPIN1 | Hypo 4 DGAT1 | Hypo 4 DGAT2 | Hypo 15 DGAT1 |  |  |  |  |  |
| D | Hypo 11 Cyclo | Hypo 17 Cyclo | Hypo 4 AGPAT1 | Hypo 4 LIPIN1 | Hypo 4 DGAT1 | Hypo 4 DGAT2 | Hypo 15 DGAT1 |  |  |  |  |  |
| E | Hypo 10 Cyclo | Hypo 13 Cyclo | Hypo 9 AGPAT1 | Hypo 9 LIPIN1 | Hypo 9 DGAT1 | Hypo 9 DGAT2 | Hypo 16 DGAT1 |  |  |  |  |  |
| F | Hypo 4 Cyclo | Hypo 15 Cyclo | Hypo 9 AGPAT1 | Hypo 9 LIPIN1 | Hypo 9 DGAT1 | Hypo 9 DGAT2 | Hypo 16 DGAT1 |  |  |  |  |  |
| G | Hypo 9 Cyclo | Hypo 16 Cyclo | Hypo 11 AGPAT1 | Hypo 11 LIPIN1 | Hypo 11 DGAT1 | Hypo 11 DGAT2 | Hypo 17 DGAT1 |  |  |  |  |  |
| H | Hypo 11 Cyclo | Hypo 17 Cyclo | Hypo 11 AGPAT1 | Hypo 11 LIPIN1 | Hypo 11 DGAT1 | Hypo 11 DGAT2 | Hypo 17 DGAT1 |  |  |  |  |  |
|  |  |  |  |  |  |  |  |  |  |  |  |  |
| PLATE 8 | 1 | 2 | 3 | 4 | 5 | 6 | 7 | 8 | 9 | 10 | 11 | 12 |
| A | Cortex 1 Cyclo | Cortex 1 Cyclo | Cortex 1 AGPAT2 | Cortex 1 AGPAT3 | Cortex 1 AGPAT4 | Cortex 1 LIPIN2 | Hippoc 10 AGPAT2 | Hippoc 10 AGPAT3 | Hippoc 10 AGPAT4 | Hippoc 10 LIPIN2 | NTC |  |
| B | Cortex 2 Cyclo | Cortex 2 Cyclo | Cortex 1 AGPAT2 | Cortex 1 AGPAT3 | Cortex 1 AGPAT4 | Cortex 1 LIPIN2 | Hippoc 10 AGPAT2 | Hippoc 10 AGPAT3 | Hippoc 10 AGPAT4 | Hippoc 10 LIPIN2 | NTC |  |
| C | Cortex 3 Cyclo | Cortex 3 Cyclo | Cortex 2 AGPAT2 | Cortex 2 AGPAT3 | Cortex 2 AGPAT4 | Cortex 2 LIPIN2 | Hippoc 5 AGPAT2 | Hippoc 5 AGPAT3 | Hippoc 5 AGPAT4 | Hippoc 5 LIPIN2 |  |  |
| D | Cortex 4 Cyclo | Cortex 4 Cyclo | Cortex 2 AGPAT2 | Cortex 2 AGPAT3 | Cortex 2 AGPAT4 | Cortex 2 LIPIN2 | Hippoc 5 AGPAT2 | Hippoc 5 AGPAT3 | Hippoc 5 AGPAT4 | Hippoc 5 LIPIN2 |  |  |
| E | Hippoc 10 Cyclo | Hippoc 10 Cyclo | Cortex 3 AGPAT2 | Cortex 3 AGPAT3 | Cortex 3 AGPAT4 | Cortex 3 LIPIN2 | Hippoc 6 AGPAT2 | Hippoc 6 AGPAT3 | Hippoc 6 AGPAT4 | Hippoc 6 LIPIN2 |  |  |
| F | Hippoc 5 Cyclo | Hippoc 5 Cyclo | Cortex 3 AGPAT2 | Cortex 3 AGPAT3 | Cortex 3 AGPAT4 | Cortex 3 LIPIN2 | Hippoc 6 AGPAT2 | Hippoc 6 AGPAT3 | Hippoc 6 AGPAT4 | Hippoc 6 LIPIN2 |  |  |
| G | Hippoc 6 Cyclo | Hippoc 6 Cyclo | Cortex 4 AGPAT2 | Cortex 4 AGPAT3 | Cortex 4 AGPAT4 | Cortex 4 LIPIN2 | Hippoc 7 AGPAT2 | Hippoc 7 AGPAT3 | Hippoc 7 AGPAT4 | Hippoc 7 LIPIN2 |  |  |
| H | Hippoc 7 Cyclo | Hippoc 7 Cyclo | Cortex 4 AGPAT2 | Cortex 4 AGPAT3 | Cortex 4 AGPAT4 | Cortex 4 LIPIN2 | Hippoc 7 AGPAT2 | Hippoc 7 AGPAT3 | Hippoc 7 AGPAT4 | Hippoc 7 LIPIN2 |  |  |
|  |  |  |  |  |  |  |  |  |  |  |  |  |
| PLATE 9 | 1 | 2 | 3 | 4 | 5 | 6 | 7 | 8 | 9 | 10 | 11 | 12 |
| A | Cer 4 Cyclo | Cer 4 Cyclo | Cer4 AGPAT2 | Cer4 AGPAT3 | Cer4 AGPAT4 | Cer 4 LIPIN2 | Hypo 10 AGPAT2 | Hypo 10 AGPAT3 | Hypo 10 AGPAT4 | Hypo 10 LIPIN2 | NTC |  |
| B | Cer 8 Cyclo | Cer 8 Cyclo | Cer4 AGPAT2 | Cer4 AGPAT3 | Cer4 AGPAT4 | Cer 4 LIPIN2 | Hypo 10 AGPAT2 | Hypo 10 AGPAT3 | Hypo 10 AGPAT4 | Hypo 10 LIPIN2 | NTC |  |
| C | Cer 9 Cyclo | Cer 9 Cyclo | Cer8 AGPAT2 | Cer8 AGPAT3 | Cer8 AGPAT4 | Cer 8 LIPIN2 | Hypo 4 AGPAT2 | Hypo 4 AGPAT3 | Hypo 4 AGPAT4 | Hypo 4 LIPIN2 |  |  |
| D | Cer 6 Cyclo | Cer 6 Cyclo | Cer8 AGPAT2 | Cer8 AGPAT3 | Cer8 AGPAT4 | Cer 8 LIPIN2 | Hypo 4 AGPAT2 | Hypo 4 AGPAT3 | Hypo 4 AGPAT4 | Hypo 4 LIPIN2 |  |  |
| E | Hypo 10 Cyclo | Hypo 10 Cyclo | Cer9 AGPAT2 | Cer9 AGPAT3 | Cer9 AGPAT2 | Cer 9 LIPIN2 | Hypo 9 AGPAT2 | Hypo 9 AGPAT3 | Hypo 9 AGPAT4 | Hypo 9 LIPIN2 |  |  |
| F | Hypo 4 Cyclo | Hypo 4 Cyclo | Cer9 AGPAT2 | Cer9 AGPAT3 | Cer9 AGPAT2 | Cer 9 LIPIN2 | Hypo 9 AGPAT2 | Hypo 9 AGPAT3 | Hypo 9 AGPAT4 | Hypo 9 LIPIN2 |  |  |
| G | Hypo 9 Cyclo | Hypo 9 Cyclo | Cer6 AGPAT2 | Cer6 AGPAT3 | Cer6 AGPAT2 | Cer 6 LIPIN2 | Hypo 11 AGPAT2 | Hypo 11 AGPAT3 | Hypo 11 AGPAT4 | Hypo 11 LIPIN2 |  |  |
| H | Hypo 11 Cyclo | Hypo 11 Cyclo | Cer6 AGPAT2 | Cer6 AGPAT3 | Cer6 AGPAT2 | Cer 6 LIPIN2 | Hypo 11 AGPAT2 | Hypo 11 AGPAT3 | Hypo 11 AGPAT4 | Hypo 11 LIPIN2 |  |  |
|  |  |  |  |  |  |  |  |  |  |  |  |  |
| PLATE 10 | 1 | 2 | 3 | 4 | 5 | 6 | 7 | 8 | 9 | 10 | 11 | 12 |
| A | Hypo 10 Cyclo | Hypo 10 Cyclo | Hypo 10 MOGAT1 | Hypo 10 MOGAT1 | Hypo 10 MOGAT2 | Hypo 10 MOGAT2 | NTC |  |  |  |  |  |
| B | Hypo 4 Cyclo | Hypo 4 Cyclo | Hypo 4 MOGAT1 | Hypo 4 MOGAT1 | Hypo 4 MOGAT2 | Hypo 4 MOGAT2 | NTC |  |  |  |  |  |
| C | Hypo 9 Cyclo | Hypo 9 Cyclo | Hypo 9 MOGAT1 | Hypo 9 MOGAT1 | Hypo 9 MOGAT2 | Hypo 9 MOGAT2 |  |  |  |  |  |  |
| D | Hypo 11 Cyclo | Hypo 11 Cyclo | Hypo 11 MOGAT1 | Hypo 11 MOGAT1 | Hypo 11 MOGAT2 | Hypo 11 MOGAT2 |  |  |  |  |  |  |
| E | Hypo 13 Cyclo | Hypo 13 Cyclo | Hypo 13 MOGAT1 | Hypo 13 MOGAT1 | Hypo 13 MOGAT2 | Hypo 13 MOGAT2 |  |  |  |  |  |  |
| F | Hypo 15 Cyclo | Hypo 15 Cyclo | Hypo 15 MOGAT1 | Hypo 15 MOGAT1 | Hypo 15 MOGAT2 | Hypo 15 MOGAT2 |  |  |  |  |  |  |
| G | Hypo 16 Cyclo | Hypo 16 Cyclo | Hypo 16 MOGAT1 | Hypo 16 MOGAT1 | Hypo 16 MOGAT2 | Hypo 16 MOGAT2 |  |  |  |  |  |  |
| H | Hypo 17 Cyclo | Hypo 17 Cyclo | Hypo 17 MOGAT1 | Hypo 17 MOGAT1 | Hypo 17 MOGAT2 | Hypo 17 MOGAT2 |  |  |  |  |  |  |
|  |  |  |  |  |  |  |  |  |  |  |  |  |
| PLATE 11 | 1 | 2 | 3 | 4 | 5 | 6 | 7 | 8 | 9 | 10 | 11 | 12 |
| A | Cortex 1 Cyclo | Cortex 1 Cyclo | Cortex 1 GPAT1 | Cortex 1 GPAT1 | Cortex 1 AGPAT1 | Cortex 1 AGPAT1 | Cortex 1 AGPAT2 | Cortex 1 AGPAT2 | NTC |  |  |  |
| B | Cortex 2 Cyclo | Cortex 2 Cyclo | Cortex 2 GPAT1 | Cortex 2 GPAT1 | Cortex 2 AGPAT1 | Cortex 2 AGPAT1 | Cortex 2 AGPAT2 | Cortex 2 AGPAT2 | NTC |  |  |  |
| C | Cortex 3 Cyclo | Cortex 3 Cyclo | Cortex 3 GPAT1 | Cortex 3 GPAT1 | Cortex 3 AGPAT1 | Cortex 3 AGPAT1 | Cortex 3 AGPAT2 | Cortex 3 AGPAT2 |  |  |  |  |
| D | Cortex 4 Cyclo | Cortex 4 Cyclo | Cortex 4 GPAT1 | Cortex 4 GPAT1 | Cortex 4 AGPAT1 | Cortex 4 AGPAT1 | Cortex 4 AGPAT2 | Cortex 4 AGPAT2 |  |  |  |  |
| E | Cortex 12 Cyclo | Cortex 12 Cyclo | Cortex 12 GPAT1 | Cortex 12 GPAT1 | Cortex 12 AGPAT1 | Cortex 12 AGPAT1 | Cortex 12 AGPAT2 | Cortex 12 AGPAT2 |  |  |  |  |
| F | Cortex 13 Cyclo | Cortex 13 Cyclo | Cortex 13 GPAT1 | Cortex 13 GPAT1 | Cortex 13 AGPAT1 | Cortex 13 AGPAT1 | Cortex 13 AGPAT2 | Cortex 13 AGPAT2 |  |  |  |  |
| G | Cortex 14 Cyclo | Cortex 14 Cyclo | Cortex 14 GPAT1 | Cortex 14 GPAT1 | Cortex 14 AGPAT1 | Cortex 14 AGPAT1 | Cortex 14 AGPAT2 | Cortex 14 AGPAT2 |  |  |  |  |
| H | Cortex 15 Cyclo | Cortex 15 Cyclo | Cortex 15 GPAT1 | Cortex 15 GPAT1 | Cortex 15 AGPAT1 | Cortex 15 AGPAT1 | Cortex 15 AGPAT2 | Cortex 15 AGPAT2 |  |  |  |  |
|  |  |  |  |  |  |  |  |  |  |  |  |  |
| PLATE 12 | 1 | 2 | 3 | 4 | 5 | 6 | 7 | 8 | 9 | 10 | 11 | 12 |
| A | Hippoc 1 Cyclo | Hippoc 1 Cyclo | Hippoc 1 GPAT1 | Hippoc 1 GPAT1 | Hippoc 1 AGPAT1 | Hippoc 1 AGPAT1 | Hippoc 1 AGPAT2 | Hippoc 1 AGPAT2 | NTC |  |  |  |
| B | Hippoc 5 Cyclo | Hippoc 5 Cyclo | Hippoc 5 GPAT1 | Hippoc 5 GPAT1 | Hippoc 5 AGPAT1 | Hippoc 5 AGPAT1 | Hippoc 5 AGPAT2 | Hippoc 5 AGPAT2 | NTC |  |  |  |
| C | Hippoc 6 Cyclo | Hippoc 6 Cyclo | Hippoc 6 GPAT1 | Hippoc 6 GPAT1 | Hippoc 6 AGPAT1 | Hippoc 6 AGPAT1 | Hippoc 6 AGPAT2 | Hippoc 6 AGPAT2 |  |  |  |  |
| D | Hippoc 7 Cyclo | Hippoc 7 Cyclo | Hippoc 7 GPAT1 | Hippoc 7 GPAT1 | Hippoc 7 AGPAT1 | Hippoc 7 AGPAT1 | Hippoc 7 AGPAT2 | Hippoc 7 AGPAT2 |  |  |  |  |
| E | Hippoc 12 Cyclo | Hippoc 12 Cyclo | Hippoc 12 GPAT1 | Hippoc 12 GPAT1 | Hippoc 12 AGPAT1 | Hippoc 12 AGPAT1 | Hippoc 12 AGPAT2 | Hippoc 12 AGPAT2 |  |  |  |  |
| F | Hippoc 13 Cyclo | Hippoc 13 Cyclo | Hippoc 13 GPAT1 | Hippoc 13 GPAT1 | Hippoc 13 AGPAT1 | Hippoc 13 AGPAT1 | Hippoc 13 AGPAT2 | Hippoc 13 AGPAT2 |  |  |  |  |
| G | Hippoc 14 Cyclo | Hippoc 14 Cyclo | Hippoc 14 GPAT1 | Hippoc 14 GPAT1 | Hippoc 14 AGPAT1 | Hippoc 14 AGPAT1 | Hippoc 14 AGPAT2 | Hippoc 14 AGPAT2 |  |  |  |  |
| H | Hippoc 15 Cyclo | Hippoc 15 Cyclo | Hippoc 15 GPAT1 | Hippoc 15 GPAT1 | Hippoc 15 AGPAT1 | Hippoc 15 AGPAT1 | Hippoc 15 AGPAT2 | Hippoc 15 AGPAT2 |  |  |  |  |
|  |  |  |  |  |  |  |  |  |  |  |  |  |
|  |  |  |  |  |  |  |  |  |  |  |  |  |
| PLATE 13 | 1 | 2 | 3 | 4 | 5 | 6 | 7 | 8 | 9 | 10 | 11 | 12 |
| A | Cer 4 Cyclo | Cer 4 Cyclo | Cer 4 GPAT1 | Cer 4 GPAT1 | Cer 4 AGPAT1 | Cer 4 AGPAT1 | Cer 4 AGPAT2 | Cer 4 AGPAT2 | NTC |  |  |  |
| B | Cer 8 Cyclo | Cer 8 Cyclo | Cer 8 GPAT1 | Cer 8 GPAT1 | Cer 8 AGPAT1 | Cer 8 AGPAT1 | Cer 8 AGPAT2 | Cer 8 AGPAT2 | NTC |  |  |  |
| C | Cer 9 Cyclo | Cer 9 Cyclo | Cer 9 GPAT1 | Cer 9 GPAT1 | Cer 9 AGPAT1 | Cer 9 AGPAT1 | Cer 9 AGPAT2 | Cer 9 AGPAT2 |  |  |  |  |
| D | Cer 6 Cyclo | Cer 6 Cyclo | Cer 6 GPAT1 | Cer 6 GPAT1 | Cer 6 AGPAT1 | Cer 6 AGPAT1 | Cer 6 AGPAT2 | Cer 6 AGPAT2 |  |  |  |  |
| E | Cer 12 Cyclo | Cer 12 Cyclo | Cer 12 GPAT1 | Cer 12 GPAT1 | Cer 12 AGPAT1 | Cer 12 AGPAT1 | Cer 12 AGPAT2 | Cer 12 AGPAT2 |  |  |  |  |
| F | Cer 13 Cyclo | Cer 13 Cyclo | Cer 13 GPAT1 | Cer 13 GPAT1 | Cer 13 AGPAT1 | Cer 13 AGPAT1 | Cer 13 AGPAT2 | Cer 13 AGPAT2 |  |  |  |  |
| G | Cer 14 Cyclo | Cer 14 Cyclo | Cer 14 GPAT1 | Cer 14 GPAT1 | Cer 14 AGPAT1 | Cer 14 AGPAT1 | Cer 14 AGPAT2 | Cer 14 AGPAT2 |  |  |  |  |
| H | Cer 15 Cyclo | Cer 15 Cyclo | Cer 15 GPAT1 | Cer 15 GPAT1 | Cer 15 AGPAT1 | Cer 15 AGPAT1 | Cer 15 AGPAT2 | Cer 15 AGPAT2 |  |  |  |  |
|  |  |  |  |  |  |  |  |  |  |  |  |  |
| PLATE 14 | 1 | 2 | 3 | 4 | 5 | 6 | 7 | 8 | 9 | 10 | 11 | 12 |
| A | Hypo 10 Cyclo | Hypo 10 Cyclo | Hypo 10 GPAT1 | Hypo 10 GPAT1 | Hypo 10 AGPAT1 | Hypo 10 AGPAT1 | Hypo 10 AGPAT2 | Hypo 10 AGPAT2 | NTC |  |  |  |
| B | Hypo 4 Cyclo | Hypo 4 Cyclo | Hypo 4 GPAT1 | Hypo 4 GPAT1 | Hypo 4 AGPAT1 | Hypo 4 AGPAT1 | Hypo 4 AGPAT2 | Hypo 4 AGPAT2 | NTC |  |  |  |
| C | Hypo 9 Cyclo | Hypo 9 Cyclo | Hypo 9 GPAT1 | Hypo 9 GPAT1 | Hypo 9 AGPAT1 | Hypo 9 AGPAT1 | Hypo 9 AGPAT2 | Hypo 9 AGPAT2 |  |  |  |  |
| D | Hypo 11 Cyclo | Hypo 11 Cyclo | Hypo 11 GPAT1 | Hypo 11 GPAT1 | Hypo 11 AGPAT1 | Hypo 11 AGPAT1 | Hypo 11 AGPAT2 | Hypo 11 AGPAT2 |  |  |  |  |
| E | Hypo 13 Cyclo | Hypo 13 Cyclo | Hypo 13 GPAT1 | Hypo 13 GPAT1 | Hypo 13 AGPAT1 | Hypo 13 AGPAT1 | Hypo 13 AGPAT2 | Hypo 13 AGPAT2 |  |  |  |  |
| F | Hypo 15 Cyclo | Hypo 15 Cyclo | Hypo 15 GPAT1 | Hypo 15 GPAT1 | Hypo 15 AGPAT1 | Hypo 15 AGPAT1 | Hypo 15 AGPAT2 | Hypo 15 AGPAT2 |  |  |  |  |
| G | Hypo 16 Cyclo | Hypo 16 Cyclo | Hypo 16 GPAT1 | Hypo 16 GPAT1 | Hypo 16 AGPAT1 | Hypo 16 AGPAT1 | Hypo 16 AGPAT2 | Hypo 16 AGPAT2 |  |  |  |  |
| H | Hypo 17 Cyclo | Hypo 17 Cyclo | Hypo 17 GPAT1 | Hypo 17 GPAT1 | Hypo 17 AGPAT1 | Hypo 17 AGPAT1 | Hypo 17 AGPAT2 | Hypo 17 AGPAT2 |  |  |  |  |
|  |  |  |  |  |  |  |  |  |  |  |  |  |
| PLATE 15 | 1 | 2 | 3 | 4 | 5 | 6 | 7 | 8 | 9 | 10 | 11 | 12 |
| A | Cortex 1 Cyclo | Cortex 1 Cyclo | Cortex 1 AGPAT3 | Cortex 1 AGPAT3 | Cortex 1 AGPAT4 | Cortex 1 AGPAT4 | Cortex 1 LIPIN1 | Cortex 1 LIPIN1 | Cortex 1 LIPIN2 | Cortex 1 LIPIN2 | Cortex 1 DGAT2 | Cortex 1 DGAT2 |
| B | Cortex 2 Cyclo | Cortex 2 Cyclo | Cortex 2 AGPAT3 | Cortex 2 AGPAT3 | Cortex 2 AGPAT4 | Cortex 2 AGPAT4 | Cortex 2 LIPIN1 | Cortex 2 LIPIN1 | Cortex 2 LIPIN2 | Cortex 2 LIPIN2 | Cortex 2 DGAT2 | Cortex 2 DGAT2 |
| C | Cortex 3 Cyclo | Cortex 3 Cyclo | Cortex 3 AGPAT3 | Cortex 3 AGPAT3 | Cortex 3 AGPAT4 | Cortex 3 AGPAT4 | Cortex 3 LIPIN1 | Cortex 3 LIPIN1 | Cortex 3 LIPIN2 | Cortex 3 LIPIN2 | Cortex 3 DGAT2 | Cortex 3 DGAT2 |
| D | Cortex 4 Cyclo | Cortex 4 Cyclo | Cortex 4 AGPAT3 | Cortex 4 AGPAT3 | Cortex 4 AGPAT4 | Cortex 4 AGPAT4 | Cortex 4 LIPIN1 | Cortex 4 LIPIN1 | Cortex 4 LIPIN2 | Cortex 4 LIPIN2 | Cortex 4 DGAT2 | Cortex 4 DGAT2 |
| E | Cortex 12 Cyclo | Cortex 12 Cyclo | Cortex 12 AGPAT3 | Cortex 12 AGPAT3 | Cortex 12 AGPAT4 | Cortex 12 AGPAT4 | Cortex 12 LIPIN1 | Cortex 12 LIPIN1 | Cortex 12 LIPIN2 | Cortex 12 LIPIN2 | Cortex 12 DGAT2 | Cortex 12 DGAT2 |
| F | Cortex 13 Cyclo | Cortex 13 Cyclo | Cortex 13 AGPAT3 | Cortex 13 AGPAT3 | Cortex 13 AGPAT4 | Cortex 13 AGPAT4 | Cortex 13 LIPIN1 | Cortex 13 LIPIN1 | Cortex 13 LIPIN2 | Cortex 13 LIPIN2 | Cortex 13 DGAT2 | Cortex 13 DGAT2 |
| G | Cortex 14 Cyclo | Cortex 14 Cyclo | Cortex 14 AGPAT3 | Cortex 14 AGPAT3 | Cortex 14 AGPAT4 | Cortex 14 AGPAT4 | Cortex 14 LIPIN1 | Cortex 14 LIPIN1 | Cortex 14 LIPIN2 | Cortex 14 LIPIN2 | Cortex 14 DGAT2 | Cortex 14 DGAT2 |
| H | Cortex 15 Cyclo | Cortex 15 Cyclo | Cortex 15 AGPAT3 | Cortex 15 AGPAT3 | Cortex 15 AGPAT4 | Cortex 15 AGPAT4 | Cortex 15 LIPIN1 | Cortex 15 LIPIN1 | Cortex 15 LIPIN2 | Cortex 15 LIPIN2 | Cortex 15 DGAT2 | NTC |
|  |  |  |  |  |  |  |  |  |  |  |  |  |
| PLATE 16 | 1 | 2 | 3 | 4 | 5 | 6 | 7 | 8 | 9 | 10 | 11 | 12 |
| A | Hippoc 1 Cyclo | Hippoc 1 Cyclo | Hippoc 1 AGPAT3 | Hippoc 1 AGPAT3 | Hippoc 1 AGPAT4 | Hippoc 1 AGPAT4 | Hippoc 1 LIPIN1 | Hippoc 1 LIPIN1 | Hippoc 1 LIPIN2 | Hippoc 1 LIPIN2 | Hippoc 1 DGAT2 | Hippoc 1 DGAT2 |
| B | Hippoc 5 Cyclo | Hippoc 5 Cyclo | Hippoc 5 AGPAT3 | Hippoc 5 AGPAT3 | Hippoc 5 AGPAT4 | Hippoc 5 AGPAT4 | Hippoc 5 LIPIN1 | Hippoc 5 LIPIN1 | Hippoc 5 LIPIN2 | Hippoc 5 LIPIN2 | Hippoc 5 DGAT2 | Hippoc 5 DGAT2 |
| C | Hippoc 6 Cyclo | Hippoc 6 Cyclo | Hippoc 6 AGPAT3 | Hippoc 6 AGPAT3 | Hippoc 6 AGPAT4 | Hippoc 6 AGPAT4 | Hippoc 6 LIPIN1 | Hippoc 6 LIPIN1 | Hippoc 6 LIPIN2 | Hippoc 6 LIPIN2 | Hippoc 6 DGAT2 | Hippoc 6 DGAT2 |
| D | Hippoc 7 Cyclo | Hippoc 7 Cyclo | Hippoc 7 AGPAT3 | Hippoc 7 AGPAT3 | Hippoc 7 AGPAT4 | Hippoc 7 AGPAT4 | Hippoc 7 LIPIN1 | Hippoc 7 LIPIN1 | Hippoc 7 LIPIN2 | Hippoc 7 LIPIN2 | Hippoc 7 DGAT2 | Hippoc 7 DGAT2 |
| E | Hippoc 12 Cyclo | Hippoc 12 Cyclo | Hippoc 12 AGPAT3 | Hippoc 12 AGPAT3 | Hippoc 12 AGPAT4 | Hippoc 12 AGPAT4 | Hippoc 12 LIPIN1 | Hippoc 12 LIPIN1 | Hippoc 12 LIPIN2 | Hippoc 12 LIPIN2 | Hippoc 12 DGAT2 | Hippoc 12 DGAT2 |
| F | Hippoc 13 Cyclo | Hippoc 13 Cyclo | Hippoc 13 AGPAT3 | Hippoc 13 AGPAT3 | Hippoc 13 AGPAT4 | Hippoc 13 AGPAT4 | Hippoc 13 LIPIN1 | Hippoc 13 LIPIN1 | Hippoc 13 LIPIN2 | Hippoc 13 LIPIN2 | Hippoc 13 DGAT2 | Hippoc 13 DGAT2 |
| G | Hippoc 14 Cyclo | Hippoc 14 Cyclo | Hippoc 14 AGPAT3 | Hippoc 14 AGPAT3 | Hippoc 14 AGPAT4 | Hippoc 14 AGPAT4 | Hippoc 14 LIPIN1 | Hippoc 14 LIPIN1 | Hippoc 14 LIPIN2 | Hippoc 14 LIPIN2 | Hippoc 14 DGAT2 | Hippoc 14 DGAT2 |
| H | Hippoc 15 Cyclo | Hippoc 15 Cyclo | Hippoc 15 AGPAT3 | Hippoc 15 AGPAT3 | Hippoc 15 AGPAT4 | Hippoc 15 AGPAT4 | Hippoc 15 LIPIN1 | Hippoc 15 LIPIN1 | Hippoc 15 LIPIN2 | Hippoc 15 LIPIN2 | Hippoc 15 DGAT2 | NTC |
|  |  |  |  |  |  |  |  |  |  |  |  |  |
| PLATE 17 | 1 | 2 | 3 | 4 | 5 | 6 | 7 | 8 | 9 | 10 | 11 | 12 |
| A | Cer 4 Cyclo | Cer 4 Cyclo | Cer 4 AGPAT3 | Cer 4 AGPAT3 | Cer 4 AGPAT4 | Cer 4 AGPAT4 | Cer 4 LIPIN1 | Cer 4 LIPIN1 | Cer 4 LIPIN2 | Cer 4 LIPIN2 | Cer 4 DGAT2 | Cer 4 DGAT2 |
| B | Cer 8 Cyclo | Cer 8 Cyclo | Cer 8 AGPAT3 | Cer 8 AGPAT3 | Cer 8 AGPAT4 | Cer 8 AGPAT4 | Cer 8 LIPIN1 | Cer 8 LIPIN1 | Cer 8 LIPIN2 | Cer 8 LIPIN2 | Cer 8 DGAT2 | Cer 8 DGAT2 |
| C | Cer 9 Cyclo | Cer 9 Cyclo | Cer 9 AGPAT3 | Cer 9 AGPAT3 | Cer 9 AGPAT4 | Cer 9 AGPAT4 | Cer 9 LIPIN1 | Cer 9 LIPIN1 | Cer 9 LIPIN2 | Cer 9 LIPIN2 | Cer 9 DGAT2 | Cer 9 DGAT2 |
| D | Cer 6 Cyclo | Cer 6 Cyclo | Cer 6 AGPAT3 | Cer 6 AGPAT3 | Cer 6 AGPAT4 | Cer 6 AGPAT4 | Cer 6 LIPIN1 | Cer 6 LIPIN1 | Cer 6 LIPIN2 | Cer 6 LIPIN2 | Cer 6 DGAT2 | Cer 6 DGAT2 |
| E | Cer 12 Cyclo | Cer 12 Cyclo | Cer 12 AGPAT3 | Cer 12 AGPAT3 | Cer 12 AGPAT4 | Cer 12 AGPAT4 | Cer 12 LIPIN1 | Cer 12 LIPIN1 | Cer 12 LIPIN2 | Cer 12 LIPIN2 | Cer 12 DGAT2 | Cer 12 DGAT2 |
| F | Cer 13 Cyclo | Cer 13 Cyclo | Cer 13 AGPAT3 | Cer 13 AGPAT3 | Cer 13 AGPAT4 | Cer 13 AGPAT4 | Cer 13 LIPIN1 | Cer 13 LIPIN1 | Cer 13 LIPIN2 | Cer 13 LIPIN2 | Cer 13 DGAT2 | Cer 13 DGAT2 |
| G | Cer 14 Cyclo | Cer 14 Cyclo | Cer 14 AGPAT3 | Cer 14 AGPAT3 | Cer 14 AGPAT4 | Cer 14 AGPAT4 | Cer 14 LIPIN1 | Cer 14 LIPIN1 | Cer 14 LIPIN2 | Cer 14 LIPIN2 | Cer 14 DGAT2 | Cer 14 DGAT2 |
| H | Cer 15 Cyclo | Cer 15 Cyclo | Cer 15 AGPAT3 | Cer 15 AGPAT3 | Cer 15 AGPAT4 | Cer 15 AGPAT4 | Cer 15 LIPIN1 | Cer 15 LIPIN1 | Cer 15 LIPIN2 | Cer 15 LIPIN2 | Cer 15 DGAT2 | NTC |
|  |  |  |  |  |  |  |  |  |  |  |  |  |
| PLATE 18 | 1 | 2 | 3 | 4 | 5 | 6 | 7 | 8 | 9 | 10 | 11 | 12 |
| A | Hypo 10 Cyclo | Hypo 10 Cyclo | Hypo 10 AGPAT3 | Hypo 10 AGPAT3 | Hypo 10 AGPAT4 | Hypo 10 AGPAT4 | Hypo 10 LIPIN1 | Hypo 10 LIPIN1 | Hypo 10 LIPIN2 | Hypo 10 LIPIN2 | Hypo 10 DGAT2 | Hypo 10 DGAT2 |
| B | Hypo 4 Cyclo | Hypo 4 Cyclo | Hypo 4 AGPAT3 | Hypo 4 AGPAT3 | Hypo 4 AGPAT4 | Hypo 4 AGPAT4 | Hypo 4 LIPIN1 | Hypo 4 LIPIN1 | Hypo 4 LIPIN2 | Hypo 4 LIPIN2 | Hypo 4 DGAT2 | Hypo 4 DGAT2 |
| C | Hypo 9 Cyclo | Hypo 9 Cyclo | Hypo 9 AGPAT3 | Hypo 9 AGPAT3 | Hypo 9 AGPAT4 | Hypo 9 AGPAT4 | Hypo 9 LIPIN1 | Hypo 9 LIPIN1 | Hypo 9 LIPIN2 | Hypo 9 LIPIN2 | Hypo 9 DGAT2 | Hypo 9 DGAT2 |
| D | Hypo 11 Cyclo | Hypo 11 Cyclo | Hypo 11 AGPAT3 | Hypo 11 AGPAT3 | Hypo 11 AGPAT4 | Hypo 11 AGPAT4 | Hypo 11 LIPIN1 | Hypo 11 LIPIN1 | Hypo 11 LIPIN2 | Hypo 11 LIPIN2 | Hypo 11 DGAT2 | Hypo 11 DGAT2 |
| E | Hypo 13 Cyclo | Hypo 13 Cyclo | Hypo 13 AGPAT3 | Hypo 13 AGPAT3 | Hypo 13 AGPAT4 | Hypo 13 AGPAT4 | Hypo 13 LIPIN1 | Hypo 13 LIPIN1 | Hypo 13 LIPIN2 | Hypo 13 LIPIN2 | Hypo 13 DGAT2 | Hypo 13 DGAT2 |
| F | Hypo 15 Cyclo | Hypo 15 Cyclo | Hypo 15 AGPAT3 | Hypo 15 AGPAT3 | Hypo 15 AGPAT4 | Hypo 15 AGPAT4 | Hypo 15 LIPIN1 | Hypo 15 LIPIN1 | Hypo 15 LIPIN2 | Hypo 15 LIPIN2 | Hypo 15 DGAT2 | Hypo 15 DGAT2 |
| G | Hypo 16 Cyclo | Hypo 16 Cyclo | Hypo 16 AGPAT3 | Hypo 16 AGPAT3 | Hypo 16 AGPAT4 | Hypo 16 AGPAT4 | Hypo 16 LIPIN1 | Hypo 16 LIPIN1 | Hypo 16 LIPIN2 | Hypo 16 LIPIN2 | Hypo 16 DGAT2 | Hypo 16 DGAT2 |
| H | Hypo 17 Cyclo | Hypo 17 Cyclo | Hypo 17 AGPAT3 | Hypo 17 AGPAT3 | Hypo 17 AGPAT4 | Hypo 17 AGPAT4 | Hypo 17 LIPIN1 | Hypo 17 LIPIN1 | Hypo 17 LIPIN2 | Hypo 17 LIPIN2 | Hypo 17 DGAT2 | NTC |
|  |  |  |  |  |  |  |  |  |  |  |  |  |
| PLATE 19 | 1 | 2 | 3 | 4 | 5 | 6 | 7 | 8 | 9 | 10 | 11 | 12 |
| A | Cortex 18 Cyclo | Hippo 19 Cyclo | Cer 20 Cyclo | Hypo 19 Cyclo | Cortex 18 GPAT1 | Cortex 18 GPAT1 | Hippo 19 GPAT1 | Hippo 19 GPAT1 | Cer 20 GPAT1 | Cer 20 GPAT1 | Hypo 19 GPAT1 | Hypo 19 GPAT1 |
| B | Cortex 19 Cyclo | Hippo 20 Cyclo | Cer 22 Cyclo | Hypo 22 Cyclo | Cortex 19 GPAT1 | Cortex 19 GPAT1 | Hippo 20 GPAT1 | Hippo 20 GPAT1 | Cer 22 GPAT1 | Cer 22 GPAT1 | Hypo 22 GPAT1 | Hypo 22 GPAT1 |
| C | Cortex 20 Cyclo | Hippo 21 Cyclo | Cer 21 Cyclo | Hypo 21 Cyclo | Cortex 20 GPAT1 | Cortex 20 GPAT1 | Hippo 21 GPAT1 | Hippo 21 GPAT1 | Cer 21 GPAT1 | Cer 21 GPAT1 | Hypo 21 GPAT1 | Hypo 21 GPAT1 |
| D | Cortex 21 Cyclo | Hippo 22 Cyclo | Cer 23 Cyclo | Hypo 23 Cyclo | Cortex 21 GPAT1 | Cortex 21 GPAT1 | Hippo 22 GPAT1 | Hippo 22 GPAT1 | Cer 23 GPAT1 | Cer 23 GPAT1 | Hypo 23 GPAT1 | Hypo 23 GPAT1 |
| E | Cortex 24 Cyclo | Hippo 25 Cyclo | Cer 29 Cyclo | Hypo 25 Cyclo | Cortex 24 GPAT1 | Cortex 24 GPAT1 | Hippo 25 GPAT1 | Hippo 25 GPAT1 | Cer 29 GPAT1 | Cer 29 GPAT1 | Hypo 25 GPAT1 | Hypo 25 GPAT1 |
| F | Cortex 25 Cyclo | Hippo 28 Cyclo | Cer 28 Cyclo | Hypo 28 Cyclo | Cortex 25 GPAT1 | Cortex 25 GPAT1 | Hippo 28 GPAT1 | Hippo 28 GPAT1 | Cer 28 GPAT1 | Cer 28 GPAT1 | Hypo 28 GPAT1 | Hypo 28 GPAT1 |
| G | Cortex 26 Cyclo | Hippo 26 Cyclo | Cer 26 Cyclo | Hypo 26 Cyclo | Cortex 26 GPAT1 | Cortex 26 GPAT1 | Hippo 26 GPAT1 | Hippo 26 GPAT1 | Cer 26 GPAT1 | Cer 26 GPAT1 | Hypo 26 GPAT1 | Hypo 26 GPAT1 |
| H | Cortex 27 Cyclo | Hippo 27 Cyclo | Cer 27 Cyclo | Hypo 27 Cyclo | Cortex 27 GPAT1 | Cortex 27 GPAT1 | Hippo 27 GPAT1 | Hippo 27 GPAT1 | Cer 27 GPAT1 | Cer 27 GPAT1 | Hypo 27 GPAT1 | NTC |
|  |  |  |  |  |  |  |  |  |  |  |  |  |
| PLATE 20 | 1 | 2 | 3 | 4 | 5 | 6 | 7 | 8 | 9 | 10 | 11 | 12 |
| A | Cortex 18 Cyclo | Hippo 19 Cyclo | Cer 20 Cyclo | Hypo 19 Cyclo | Cortex 18 AGPAT1 | Cortex 18 AGPAT1 | Hippo 19 AGPAT1 | Hippo 19 AGPAT1 | Cer 20 AGPAT1 | Cer 20 AGPAT1 | Hypo 19 AGPAT1 | Hypo 19 AGPAT1 |
| B | Cortex 19 Cyclo | Hippo 20 Cyclo | Cer 22 Cyclo | Hypo 22 Cyclo | Cortex 19 AGPAT1 | Cortex 19 AGPAT1 | Hippo 20 AGPAT1 | Hippo 20 AGPAT1 | Cer 22 AGPAT1 | Cer 22 AGPAT1 | Hypo 22 AGPAT1 | Hypo 22 AGPAT1 |
| C | Cortex 20 Cyclo | Hippo 21 Cyclo | Cer 21 Cyclo | Hypo 21 Cyclo | Cortex 20 AGPAT1 | Cortex 20 AGPAT1 | Hippo 21 AGPAT1 | Hippo 21 AGPAT1 | Cer 21 AGPAT1 | Cer 21 AGPAT1 | Hypo 21 AGPAT1 | Hypo 21 AGPAT1 |
| D | Cortex 21 Cyclo | Hippo 22 Cyclo | Cer 23 Cyclo | Hypo 23 Cyclo | Cortex 21 AGPAT1 | Cortex 21 AGPAT1 | Hippo 22 AGPAT1 | Hippo 22 AGPAT1 | Cer 23 AGPAT1 | Cer 23 AGPAT1 | Hypo 23 AGPAT1 | Hypo 23 AGPAT1 |
| E | Cortex 24 Cyclo | Hippo 25 Cyclo | Cer 29 Cyclo | Hypo 25 Cyclo | Cortex 24 AGPAT1 | Cortex 24 AGPAT1 | Hippo 25 AGPAT1 | Hippo 25 AGPAT1 | Cer 29 AGPAT1 | Cer 29 AGPAT1 | Hypo 25 AGPAT1 | Hypo 25 AGPAT1 |
| F | Cortex 25 Cyclo | Hippo 28 Cyclo | Cer 28 Cyclo | Hypo 28 Cyclo | Cortex 25 AGPAT1 | Cortex 25 AGPAT1 | Hippo 28 AGPAT1 | Hippo 28 AGPAT1 | Cer 28 AGPAT1 | Cer 28 AGPAT1 | Hypo 28 AGPAT1 | Hypo 28 AGPAT1 |
| G | Cortex 26 Cyclo | Hippo 26 Cyclo | Cer 26 Cyclo | Hypo 26 Cyclo | Cortex 26 AGPAT1 | Cortex 26 AGPAT1 | Hippo 26 AGPAT1 | Hippo 26 AGPAT1 | Cer 26 AGPAT1 | Cer 26 AGPAT1 | Hypo 26 AGPAT1 | Hypo 26 AGPAT1 |
| H | Cortex 27 Cyclo | Hippo 27 Cyclo | Cer 27 Cyclo | Hypo 27 Cyclo | Cortex 27 AGPAT1 | Cortex 27 AGPAT1 | Hippo 27 AGPAT1 | Hippo 27 AGPAT1 | Cer 27 AGPAT1 | Cer 27 AGPAT1 | Hypo 27 AGPAT1 | NTC |
|  |  |  |  |  |  |  |  |  |  |  |  |  |
| PLATE 21 | 1 | 2 | 3 | 4 | 5 | 6 | 7 | 8 | 9 | 10 | 11 | 12 |
| A | Cortex 18 Cyclo | Hippo 19 Cyclo | Cortex 18 AGPAT2 | Cortex 18 AGPAT2 | Cortex 18 LIPIN2 | Cortex 18 LIPIN2 | Hippo 19 AGPAT2 | Hippo 19 AGPAT2 | Hippo 19 LIPIN2 | Hippo 19 LIPIN2 | NTC |  |
| B | Cortex 19 Cyclo | Hippo 20 Cyclo | Cortex 19 AGPAT2 | Cortex 19 AGPAT2 | Cortex 19 LIPIN2 | Cortex 19 LIPIN2 | Hippo 20 AGPAT2 | Hippo 20 AGPAT2 | Hippo 20 LIPIN2 | Hippo 20 LIPIN2 | NTC |  |
| C | Cortex 20 Cyclo | Hippo 21 Cyclo | Cortex 20 AGPAT2 | Cortex 20 AGPAT2 | Cortex 20 LIPIN2 | Cortex 20 LIPIN2 | Hippo 21 AGPAT2 | Hippo 21 AGPAT2 | Hippo 21 LIPIN2 | Hippo 21 LIPIN2 |  |  |
| D | Cortex 21 Cyclo | Hippo 22 Cyclo | Cortex 21 AGPAT2 | Cortex 21 AGPAT2 | Cortex 21 LIPIN2 | Cortex 21 LIPIN2 | Hippo 22 AGPAT2 | Hippo 22 AGPAT2 | Hippo 22 LIPIN2 | Hippo 22 LIPIN2 |  |  |
| E | Cortex 24 Cyclo | Hippo 25 Cyclo | Cortex 24 AGPAT2 | Cortex 24 AGPAT2 | Cortex 24 LIPIN2 | Cortex 24 LIPIN2 | Hippo 25 AGPAT2 | Hippo 25 AGPAT2 | Hippo 25 LIPIN2 | Hippo 25 LIPIN2 |  |  |
| F | Cortex 25 Cyclo | Hippo 28 Cyclo | Cortex 25 AGPAT2 | Cortex 25 AGPAT2 | Cortex 25 LIPIN2 | Cortex 25 LIPIN2 | Hippo 28 AGPAT2 | Hippo 28 AGPAT2 | Hippo 28 LIPIN2 | Hippo 28 LIPIN2 |  |  |
| G | Cortex 26 Cyclo | Hippo 26 Cyclo | Cortex 26 AGPAT2 | Cortex 26 AGPAT2 | Cortex 26 LIPIN2 | Cortex 26 LIPIN2 | Hippo 26 AGPAT2 | Hippo 26 AGPAT2 | Hippo 26 LIPIN2 | Hippo 26 LIPIN2 |  |  |
| H | Cortex 27 Cyclo | Hippo 27 Cyclo | Cortex 27 AGPAT2 | Cortex 27 AGPAT2 | Cortex 27 LIPIN2 | Cortex 27 LIPIN2 | Hippo 27 AGPAT2 | Hippo 27 AGPAT2 | Hippo 27 LIPIN2 | Hippo 27 LIPIN2 |  |  |
|  |  |  |  |  |  |  |  |  |  |  |  |  |
| PLATE 22 | 1 | 2 | 3 | 4 | 5 | 6 | 7 | 8 | 9 | 10 | 11 | 12 |
| A | Cer 20 Cyclo | Hypo 19 Cyclo | Cer 20 AGPAT2 | Cer 20 AGPAT2 | Cer 20 LIPIN2 | Cer 20 LIPIN2 | Hypo 19 AGPAT2 | Hypo 19 AGPAT2 | Hypo 19 LIPIN2 | Hypo 19 LIPIN2 | NTC |  |
| B | Cer 22 Cyclo | Hypo 22 Cyclo | Cer 22 AGPAT2 | Cer 22 AGPAT2 | Cer 22 LIPIN2 | Cer 22 LIPIN2 | Hypo 22 AGPAT2 | Hypo 22 AGPAT2 | Hypo 22 LIPIN2 | Hypo 22 LIPIN2 | NTC |  |
| C | Cer 21 Cyclo | Hypo 21 Cyclo | Cer 21 AGPAT2 | Cer 21 AGPAT2 | Cer 21 LIPIN2 | Cer 21 LIPIN2 | Hypo 21 AGPAT2 | Hypo 21 AGPAT2 | Hypo 21 LIPIN2 | Hypo 21 LIPIN2 |  |  |
| D | Cer 23 Cyclo | Hypo 23 Cyclo | Cer 23 AGPAT2 | Cer 23 AGPAT2 | Cer 23 LIPIN2 | Cer 23 LIPIN2 | Hypo 23 AGPAT2 | Hypo 23 AGPAT2 | Hypo 23 LIPIN2 | Hypo 23 LIPIN2 |  |  |
| E | Cer 29 Cyclo | Hypo 25 Cyclo | Cer 29 AGPAT2 | Cer 29 AGPAT2 | Cer 29 LIPIN2 | Cer 29 LIPIN2 | Hypo 25 AGPAT2 | Hypo 25 AGPAT2 | Hypo 25 LIPIN2 | Hypo 25 LIPIN2 |  |  |
| F | Cer 28 Cyclo | Hypo 28 Cyclo | Cer 28 AGPAT2 | Cer 28 AGPAT2 | Cer 28 LIPIN2 | Cer 28 LIPIN2 | Hypo 28 AGPAT2 | Hypo 28 AGPAT2 | Hypo 28 LIPIN2 | Hypo 28 LIPIN2 |  |  |
| G | Cer 26 Cyclo | Hypo 26 Cyclo | Cer 26 AGPAT2 | Cer 26 AGPAT2 | Cer 26 LIPIN2 | Cer 26 LIPIN2 | Hypo 26 AGPAT2 | Hypo 26 AGPAT2 | Hypo 26 LIPIN2 | Hypo 26 LIPIN2 |  |  |
| H | Cer 27 Cyclo | Hypo 27 Cyclo | Cer 27 AGPAT2 | Cer 27 AGPAT2 | Cer 27 LIPIN2 | Cer 27 LIPIN2 | Hypo 27 AGPAT2 | Hypo 27 AGPAT2 | Hypo 27 LIPIN2 | Hypo 27 LIPIN2 |  |  |
|  |  |  |  |  |  |  |  |  |  |  |  |  |
| PLATE 23 | 1 | 2 | 3 | 4 | 5 | 6 | 7 | 8 | 9 | 10 | 11 | 12 |
| A | Cortex 18 Cyclo | Hippo 19 Cyclo | Cer 20 Cyclo | Hypo 19 Cyclo | Cortex 18 AGPAT3 | Cortex 18 AGPAT3 | Hippo 19 AGPAT3 | Hippo 19 AGPAT3 | Cer 20 AGPAT3 | Cer 20 AGPAT3 | Hypo 19 AGPAT3 | Hypo 19 AGPAT3 |
| B | Cortex 19 Cyclo | Hippo 20 Cyclo | Cer 22 Cyclo | Hypo 22 Cyclo | Cortex 19 AGPAT3 | Cortex 19 AGPAT3 | Hippo 20 AGPAT3 | Hippo 20 AGPAT3 | Cer 22 AGPAT3 | Cer 22 AGPAT3 | Hypo 22 AGPAT3 | Hypo 22 AGPAT3 |
| C | Cortex 20 Cyclo | Hippo 21 Cyclo | Cer 21 Cyclo | Hypo 21 Cyclo | Cortex 20 AGPAT3 | Cortex 20 AGPAT3 | Hippo 21 AGPAT3 | Hippo 21 AGPAT3 | Cer 21 AGPAT3 | Cer 21 AGPAT3 | Hypo 21 AGPAT3 | Hypo 21 AGPAT3 |
| D | Cortex 21 Cyclo | Hippo 22 Cyclo | Cer 23 Cyclo | Hypo 23 Cyclo | Cortex 21 AGPAT3 | Cortex 21 AGPAT3 | Hippo 22 AGPAT3 | Hippo 22 AGPAT3 | Cer 23 AGPAT3 | Cer 23 AGPAT3 | Hypo 23 AGPAT3 | Hypo 23 AGPAT3 |
| E | Cortex 24 Cyclo | Hippo 25 Cyclo | Cer 29 Cyclo | Hypo 25 Cyclo | Cortex 24 AGPAT3 | Cortex 24 AGPAT3 | Hippo 25 AGPAT3 | Hippo 25 AGPAT3 | Cer 29 AGPAT3 | Cer 29 AGPAT3 | Hypo 25 AGPAT3 | Hypo 25 AGPAT3 |
| F | Cortex 25 Cyclo | Hippo 28 Cyclo | Cer 28 Cyclo | Hypo 28 Cyclo | Cortex 25 AGPAT3 | Cortex 25 AGPAT3 | Hippo 28 AGPAT3 | Hippo 28 AGPAT3 | Cer 28 AGPAT3 | Cer 28 AGPAT3 | Hypo 28 AGPAT3 | Hypo 28 AGPAT3 |
| G | Cortex 26 Cyclo | Hippo 26 Cyclo | Cer 26 Cyclo | Hypo 26 Cyclo | Cortex 26 AGPAT3 | Cortex 26 AGPAT3 | Hippo 26 AGPAT3 | Hippo 26 AGPAT3 | Cer 26 AGPAT3 | Cer 26 AGPAT3 | Hypo 26 AGPAT3 | Hypo 26 AGPAT3 |
| H | Cortex 27 Cyclo | Hippo 27 Cyclo | Cer 27 Cyclo | Hypo 27 Cyclo | Cortex 27 AGPAT3 | Cortex 27 AGPAT3 | Hippo 27 AGPAT3 | Hippo 27 AGPAT3 | Cer 27 AGPAT3 | Cer 27 AGPAT3 | Hypo 27 AGPAT3 | NTC |
|  |  |  |  |  |  |  |  |  |  |  |  |  |
| PLATE 24 | 1 | 2 | 3 | 4 | 5 | 6 | 7 | 8 | 9 | 10 | 11 | 12 |
| A | Cortex 18 Cyclo | Hippo 19 Cyclo | Cer 20 Cyclo | Hypo 19 Cyclo | Cortex 18 AGPAT4 | Cortex 18 AGPAT4 | Hippo 19 AGPAT4 | Hippo 19 AGPAT4 | Cer 20 AGPAT4 | Cer 20 AGPAT4 | Hypo 19 AGPAT4 | Hypo 19 AGPAT4 |
| B | Cortex 19 Cyclo | Hippo 20 Cyclo | Cer 22 Cyclo | Hypo 22 Cyclo | Cortex 19 AGPAT4 | Cortex 19 AGPAT4 | Hippo 20 AGPAT4 | Hippo 20 AGPAT4 | Cer 22 AGPAT4 | Cer 22 AGPAT4 | Hypo 22 AGPAT4 | Hypo 22 AGPAT4 |
| C | Cortex 20 Cyclo | Hippo 21 Cyclo | Cer 21 Cyclo | Hypo 21 Cyclo | Cortex 20 AGPAT4 | Cortex 20 AGPAT4 | Hippo 21 AGPAT4 | Hippo 21 AGPAT4 | Cer 21 AGPAT4 | Cer 21 AGPAT4 | Hypo 21 AGPAT4 | Hypo 21 AGPAT4 |
| D | Cortex 21 Cyclo | Hippo 22 Cyclo | Cer 23 Cyclo | Hypo 23 Cyclo | Cortex 21 AGPAT4 | Cortex 21 AGPAT4 | Hippo 22 AGPAT4 | Hippo 22 AGPAT4 | Cer 23 AGPAT4 | Cer 23 AGPAT4 | Hypo 23 AGPAT4 | Hypo 23 AGPAT4 |
| E | Cortex 24 Cyclo | Hippo 25 Cyclo | Cer 29 Cyclo | Hypo 25 Cyclo | Cortex 24 AGPAT4 | Cortex 24 AGPAT4 | Hippo 25 AGPAT4 | Hippo 25 AGPAT4 | Cer 29 AGPAT4 | Cer 29 AGPAT4 | Hypo 25 AGPAT4 | Hypo 25 AGPAT4 |
| F | Cortex 25 Cyclo | Hippo 28 Cyclo | Cer 28 Cyclo | Hypo 28 Cyclo | Cortex 25 AGPAT4 | Cortex 25 AGPAT4 | Hippo 28 AGPAT4 | Hippo 28 AGPAT4 | Cer 28 AGPAT4 | Cer 28 AGPAT4 | Hypo 28 AGPAT4 | Hypo 28 AGPAT4 |
| G | Cortex 26 Cyclo | Hippo 26 Cyclo | Cer 26 Cyclo | Hypo 26 Cyclo | Cortex 26 AGPAT4 | Cortex 26 AGPAT4 | Hippo 26 AGPAT4 | Hippo 26 AGPAT4 | Cer 26 AGPAT4 | Cer 26 AGPAT4 | Hypo 26 AGPAT4 | Hypo 26 AGPAT4 |
| H | Cortex 27 Cyclo | Hippo 27 Cyclo | Cer 27 Cyclo | Hypo 27 Cyclo | Cortex 27 AGPAT4 | Cortex 27 AGPAT4 | Hippo 27 AGPAT4 | Hippo 27 AGPAT4 | Cer 27 AGPAT4 | Cer 27 AGPAT4 | Hypo 27 AGPAT4 | NTC |
|  |  |  |  |  |  |  |  |  |  |  |  |  |
| PLATE 25 | 1 | 2 | 3 | 4 | 5 | 6 | 7 | 8 | 9 | 10 | 11 | 12 |
| A | Cortex 18 Cyclo | Hippo 19 Cyclo | Cer 20 Cyclo | Hypo 19 Cyclo | Cortex 18 LIPIN1 | Cortex 18 LIPIN1 | Hippo 19 LIPIN1 | Hippo 19 LIPIN1 | Cer 20 LIPIN1 | Cer 20 LIPIN1 | Hypo 19 LIPIN1 | Hypo 19 LIPIN1 |
| B | Cortex 19 Cyclo | Hippo 20 Cyclo | Cer 22 Cyclo | Hypo 22 Cyclo | Cortex 19 LIPIN1 | Cortex 19 LIPIN1 | Hippo 20 LIPIN1 | Hippo 20 LIPIN1 | Cer 22 LIPIN1 | Cer 22 LIPIN1 | Hypo 22 LIPIN1 | Hypo 22 LIPIN1 |
| C | Cortex 20 Cyclo | Hippo 21 Cyclo | Cer 21 Cyclo | Hypo 21 Cyclo | Cortex 20 LIPIN1 | Cortex 20 LIPIN1 | Hippo 21 LIPIN1 | Hippo 21 LIPIN1 | Cer 21 LIPIN1 | Cer 21 LIPIN1 | Hypo 21 LIPIN1 | Hypo 21 LIPIN1 |
| D | Cortex 21 Cyclo | Hippo 22 Cyclo | Cer 23 Cyclo | Hypo 23 Cyclo | Cortex 21 LIPIN1 | Cortex 21 LIPIN1 | Hippo 22 LIPIN1 | Hippo 22 LIPIN1 | Cer 23 LIPIN1 | Cer 23 LIPIN1 | Hypo 23 LIPIN1 | Hypo 23 LIPIN1 |
| E | Cortex 24 Cyclo | Hippo 25 Cyclo | Cer 29 Cyclo | Hypo 25 Cyclo | Cortex 24 LIPIN1 | Cortex 24 LIPIN1 | Hippo 25 LIPIN1 | Hippo 25 LIPIN1 | Cer 29 LIPIN1 | Cer 29 LIPIN1 | Hypo 25 LIPIN1 | Hypo 25 LIPIN1 |
| F | Cortex 25 Cyclo | Hippo 28 Cyclo | Cer 28 Cyclo | Hypo 28 Cyclo | Cortex 25 LIPIN1 | Cortex 25 LIPIN1 | Hippo 28 LIPIN1 | Hippo 28 LIPIN1 | Cer 28 LIPIN1 | Cer 28 LIPIN1 | Hypo 28 LIPIN1 | Hypo 28 LIPIN1 |
| G | Cortex 26 Cyclo | Hippo 26 Cyclo | Cer 26 Cyclo | Hypo 26 Cyclo | Cortex 26 LIPIN1 | Cortex 26 LIPIN1 | Hippo 26 LIPIN1 | Hippo 26 LIPIN1 | Cer 26 LIPIN1 | Cer 26 LIPIN1 | Hypo 26 LIPIN1 | Hypo 26 LIPIN1 |
| H | Cortex 27 Cyclo | Hippo 27 Cyclo | Cer 27 Cyclo | Hypo 27 Cyclo | Cortex 27 LIPIN1 | Cortex 27 LIPIN1 | Hippo 27 LIPIN1 | Hippo 27 LIPIN1 | Cer 27 LIPIN1 | Cer 27 LIPIN1 | Hypo 27 LIPIN1 | NTC |
|  |  |  |  |  |  |  |  |  |  |  |  |  |
| PLATE 26 | 1 | 2 | 3 | 4 | 5 | 6 | 7 | 8 | 9 | 10 | 11 | 12 |
| A | Cortex 18 Cyclo | Hippo 19 Cyclo | Cortex 18 DGAT1 | Cortex 18 DGAT1 | Cortex 18 DGAT2 | Cortex 18 DGAT2 | Hippo 19 DGAT1 | Hippo 19 DGAT1 | Hippo 19 DGAT2 | Hippo 19 DGAT2 | NTC |  |
| B | Cortex 19 Cyclo | Hippo 20 Cyclo | Cortex 19 DGAT1 | Cortex 19 DGAT1 | Cortex 19 DGAT2 | Cortex 19 DGAT2 | Hippo 20 DGAT1 | Hippo 20 DGAT1 | Hippo 20 DGAT2 | Hippo 20 DGAT2 | NTC |  |
| C | Cortex 20 Cyclo | Hippo 21 Cyclo | Cortex 20 DGAT1 | Cortex 20 DGAT1 | Cortex 20 DGAT2 | Cortex 20 DGAT2 | Hippo 21 DGAT1 | Hippo 21 DGAT1 | Hippo 21 DGAT2 | Hippo 21 DGAT2 |  |  |
| D | Cortex 21 Cyclo | Hippo 22 Cyclo | Cortex 21 DGAT1 | Cortex 21 DGAT1 | Cortex 21 DGAT2 | Cortex 21 DGAT2 | Hippo 22 DGAT1 | Hippo 22 DGAT1 | Hippo 22 DGAT2 | Hippo 22 DGAT2 |  |  |
| E | Cortex 24 Cyclo | Hippo 25 Cyclo | Cortex 24 DGAT1 | Cortex 24 DGAT1 | Cortex 24 DGAT2 | Cortex 24 DGAT2 | Hippo 25 DGAT1 | Hippo 25 DGAT1 | Hippo 25 DGAT2 | Hippo 25 DGAT2 |  |  |
| F | Cortex 25 Cyclo | Hippo 28 Cyclo | Cortex 25 DGAT1 | Cortex 25 DGAT1 | Cortex 25 DGAT2 | Cortex 25 DGAT2 | Hippo 28 DGAT1 | Hippo 28 DGAT1 | Hippo 28 DGAT2 | Hippo 28 DGAT2 |  |  |
| G | Cortex 26 Cyclo | Hippo 26 Cyclo | Cortex 26 DGAT1 | Cortex 26 DGAT1 | Cortex 26 DGAT2 | Cortex 26 DGAT2 | Hippo 26 DGAT1 | Hippo 26 DGAT1 | Hippo 26 DGAT2 | Hippo 26 DGAT2 |  |  |
| H | Cortex 27 Cyclo | Hippo 27 Cyclo | Cortex 27 DGAT1 | Cortex 27 DGAT1 | Cortex 27 DGAT2 | Cortex 27 DGAT2 | Hippo 27 DGAT1 | Hippo 27 DGAT1 | Hippo 27 DGAT2 | Hippo 27 DGAT2 |  |  |
|  |  |  |  |  |  |  |  |  |  |  |  |  |
| PLATE 27 | 1 | 2 | 3 | 4 | 5 | 6 | 7 | 8 | 9 | 10 | 11 | 12 |
| A | Cer 20 Cyclo | Hypo 19 Cyclo | Cer 20 DGAT1 | Cer 20 DGAT1 | Cer 20 DGAT2 | Cer 20 DGAT2 | Hypo 19 DGAT1 | Hypo 19 DGAT1 | Hypo 19 DGAT2 | Hypo 19 DGAT2 | NTC |  |
| B | Cer 22 Cyclo | Hypo 22 Cyclo | Cer 22 DGAT1 | Cer 22 DGAT1 | Cer 22 DGAT2 | Cer 22 DGAT2 | Hypo 22 DGAT1 | Hypo 22 DGAT1 | Hypo 22 DGAT2 | Hypo 22 DGAT2 | NTC |  |
| C | Cer 21 Cyclo | Hypo 21 Cyclo | Cer 21 DGAT1 | Cer 21 DGAT1 | Cer 21 DGAT2 | Cer 21 DGAT2 | Hypo 21 DGAT1 | Hypo 21 DGAT1 | Hypo 21 DGAT2 | Hypo 21 DGAT2 |  |  |
| D | Cer 23 Cyclo | Hypo 23 Cyclo | Cer 23 DGAT1 | Cer 23 DGAT1 | Cer 23 DGAT2 | Cer 23 DGAT2 | Hypo 23 DGAT1 | Hypo 23 DGAT1 | Hypo 23 DGAT2 | Hypo 23 DGAT2 |  |  |
| E | Cer 29 Cyclo | Hypo 25 Cyclo | Cer 29 DGAT1 | Cer 29 DGAT1 | Cer 29 DGAT2 | Cer 29 DGAT2 | Hypo 25 DGAT1 | Hypo 25 DGAT1 | Hypo 25 DGAT2 | Hypo 25 DGAT2 |  |  |
| F | Cer 28 Cyclo | Hypo 28 Cyclo | Cer 28 DGAT1 | Cer 28 DGAT1 | Cer 28 DGAT2 | Cer 28 DGAT2 | Hypo 28 DGAT1 | Hypo 28 DGAT1 | Hypo 28 DGAT2 | Hypo 28 DGAT2 |  |  |
| G | Cer 26 Cyclo | Hypo 26 Cyclo | Cer 26 DGAT1 | Cer 26 DGAT1 | Cer 26 DGAT2 | Cer 26 DGAT2 | Hypo 26 DGAT1 | Hypo 26 DGAT1 | Hypo 26 DGAT2 | Hypo 26 DGAT2 |  |  |
| H | Cer 27 Cyclo | Hypo 27 Cyclo | Cer 27 DGAT1 | Cer 27 DGAT1 | Cer 27 DGAT2 | Cer 27 DGAT2 | Hypo 27 DGAT1 | Hypo 27 DGAT1 | Hypo 27 DGAT2 | Hypo 27 DGAT2 |  |  |
|  |  |  |  |  |  |  |  |  |  |  |  |  |
| PLATE 28 | 1 | 2 | 3 | 4 | 5 | 6 | 7 | 8 | 9 | 10 | 11 | 12 |
| A | Cortex 18 Cyclo | Hippo 19 Cyclo | Cer 20 Cyclo | Hypo 19 Cyclo | Cortex 18 MOGAT1 | Cortex 18 MOGAT1 | Hippo 19 MOGAT1 | Hippo 19 MOGAT1 | Cer 20 MOGAT1 | Cer 20 MOGAT1 | Hypo 19 MOGAT1 | Hypo 19 MOGAT1 |
| B | Cortex 19 Cyclo | Hippo 20 Cyclo | Cer 22 Cyclo | Hypo 22 Cyclo | Cortex 19 MOGAT1 | Cortex 19 MOGAT1 | Hippo 20 MOGAT1 | Hippo 20 MOGAT1 | Cer 22 MOGAT1 | Cer 22 MOGAT1 | Hypo 22 MOGAT1 | Hypo 22 MOGAT1 |
| C | Cortex 20 Cyclo | Hippo 21 Cyclo | Cer 21 Cyclo | Hypo 21 Cyclo | Cortex 20 MOGAT1 | Cortex 20 MOGAT1 | Hippo 21 MOGAT1 | Hippo 21 MOGAT1 | Cer 21 MOGAT1 | Cer 21 MOGAT1 | Hypo 21 MOGAT1 | Hypo 21 MOGAT1 |
| D | Cortex 21 Cyclo | Hippo 22 Cyclo | Cer 23 Cyclo | Hypo 23 Cyclo | Cortex 21 MOGAT1 | Cortex 21 MOGAT1 | Hippo 22 MOGAT1 | Hippo 22 MOGAT1 | Cer 23 MOGAT1 | Cer 23 MOGAT1 | Hypo 23 MOGAT1 | Hypo 23 MOGAT1 |
| E | Cortex 24 Cyclo | Hippo 25 Cyclo | Cer 29 Cyclo | Hypo 25 Cyclo | Cortex 24 MOGAT1 | Cortex 24 MOGAT1 | Hippo 25 MOGAT1 | Hippo 25 MOGAT1 | Cer 29 MOGAT1 | Cer 29 MOGAT1 | Hypo 25 MOGAT1 | Hypo 25 MOGAT1 |
| F | Cortex 25 Cyclo | Hippo 28 Cyclo | Cer 28 Cyclo | Hypo 28 Cyclo | Cortex 25 MOGAT1 | Cortex 25 MOGAT1 | Hippo 28 MOGAT1 | Hippo 28 MOGAT1 | Cer 28 MOGAT1 | Cer 28 MOGAT1 | Hypo 28 MOGAT1 | Hypo 28 MOGAT1 |
| G | Cortex 26 Cyclo | Hippo 26 Cyclo | Cer 26 Cyclo | Hypo 26 Cyclo | Cortex 26 MOGAT1 | Cortex 26 MOGAT1 | Hippo 26 MOGAT1 | Hippo 26 MOGAT1 | Cer 26 MOGAT1 | Cer 26 MOGAT1 | Hypo 26 MOGAT1 | Hypo 26 MOGAT1 |
| H | Cortex 27 Cyclo | Hippo 27 Cyclo | Cer 27 Cyclo | Hypo 27 Cyclo | Cortex 27 MOGAT1 | Cortex 27 MOGAT1 | Hippo 27 MOGAT1 | Hippo 27 MOGAT1 | Cer 27 MOGAT1 | Cer 27 MOGAT1 | Hypo 27 MOGAT1 | NTC |

Hippo: Hippocampus

Cer: Cerebellum

Hypo: Hypothalamus

Cyclo: Cyclophilin

NTC: no template control
